# Supplementary material
Source: PubMed Central journal article supplement (PMC3814683)

**A. Targeting Strategy to Generate Floxed Coll1a1**

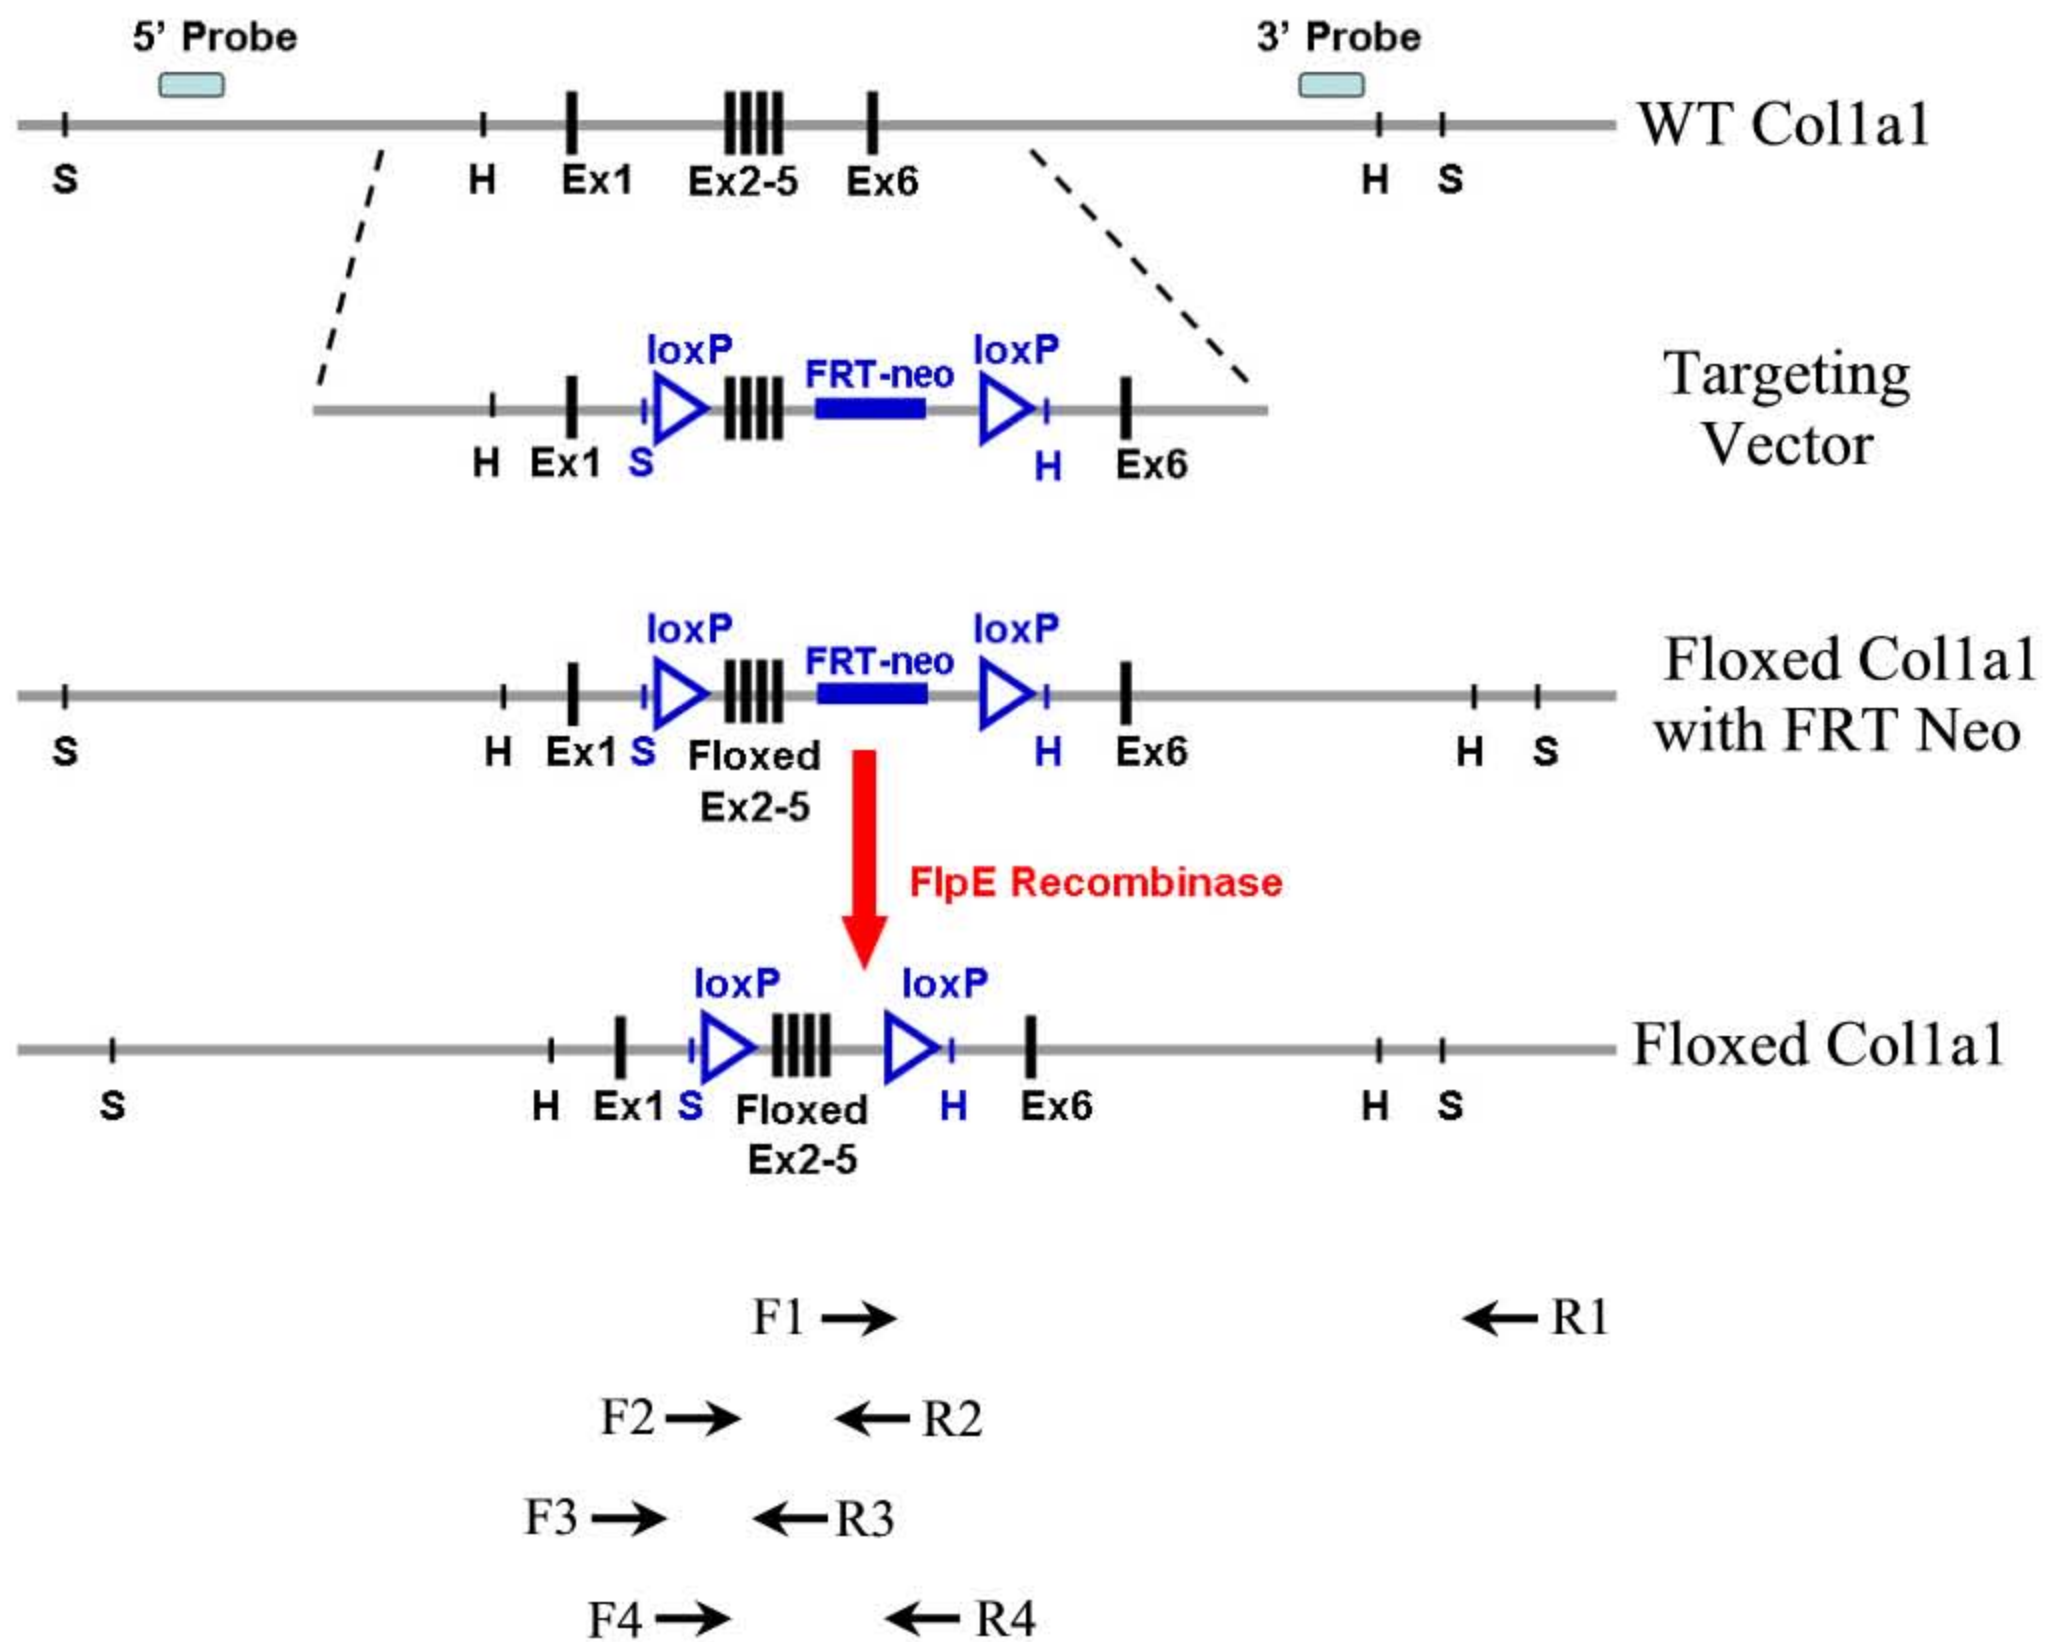

**B. Targeting Confirmed by Southern Blot**

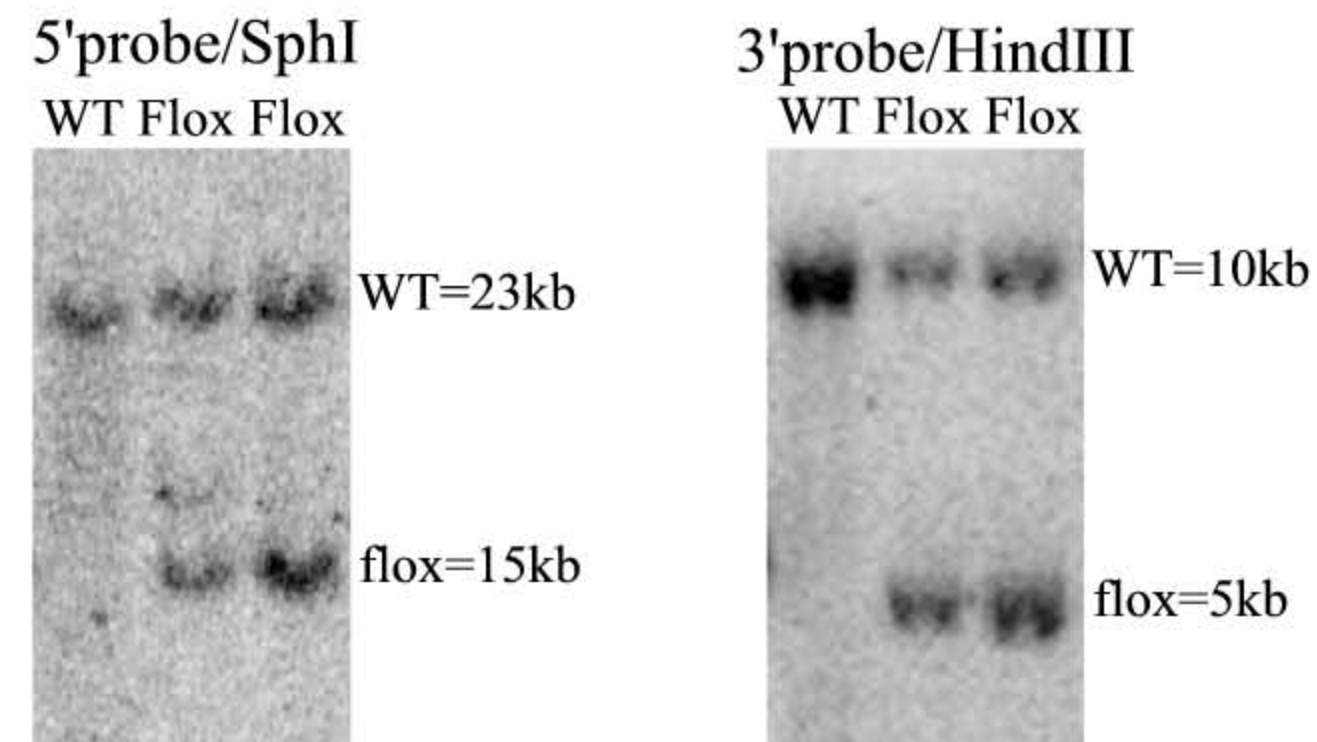

**C. Targeting Confirmed by PCR**

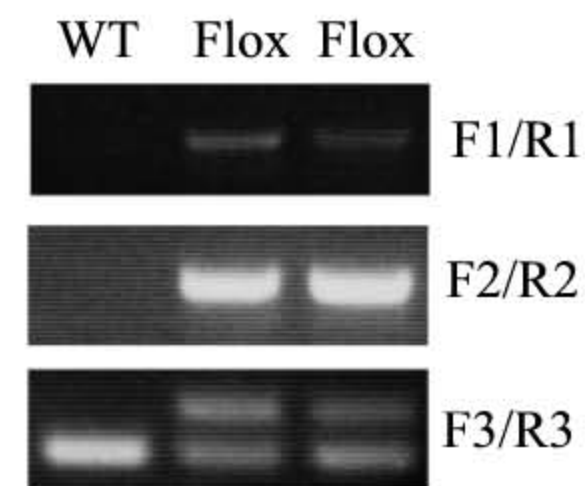

**D. Deletion of FRT Neo**

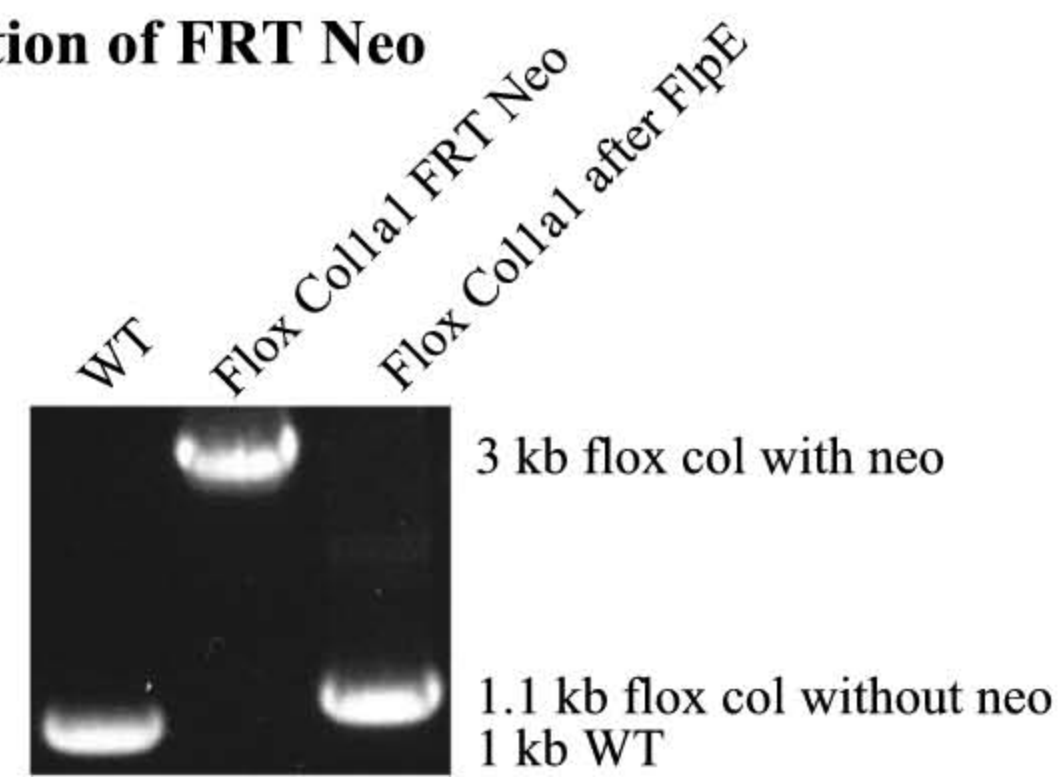

Supplement: mmc1.pdf [file mmc1.pdf]
