# Supplementary material
Source: PubMed Central journal article supplement (PMC3814683)

**A.**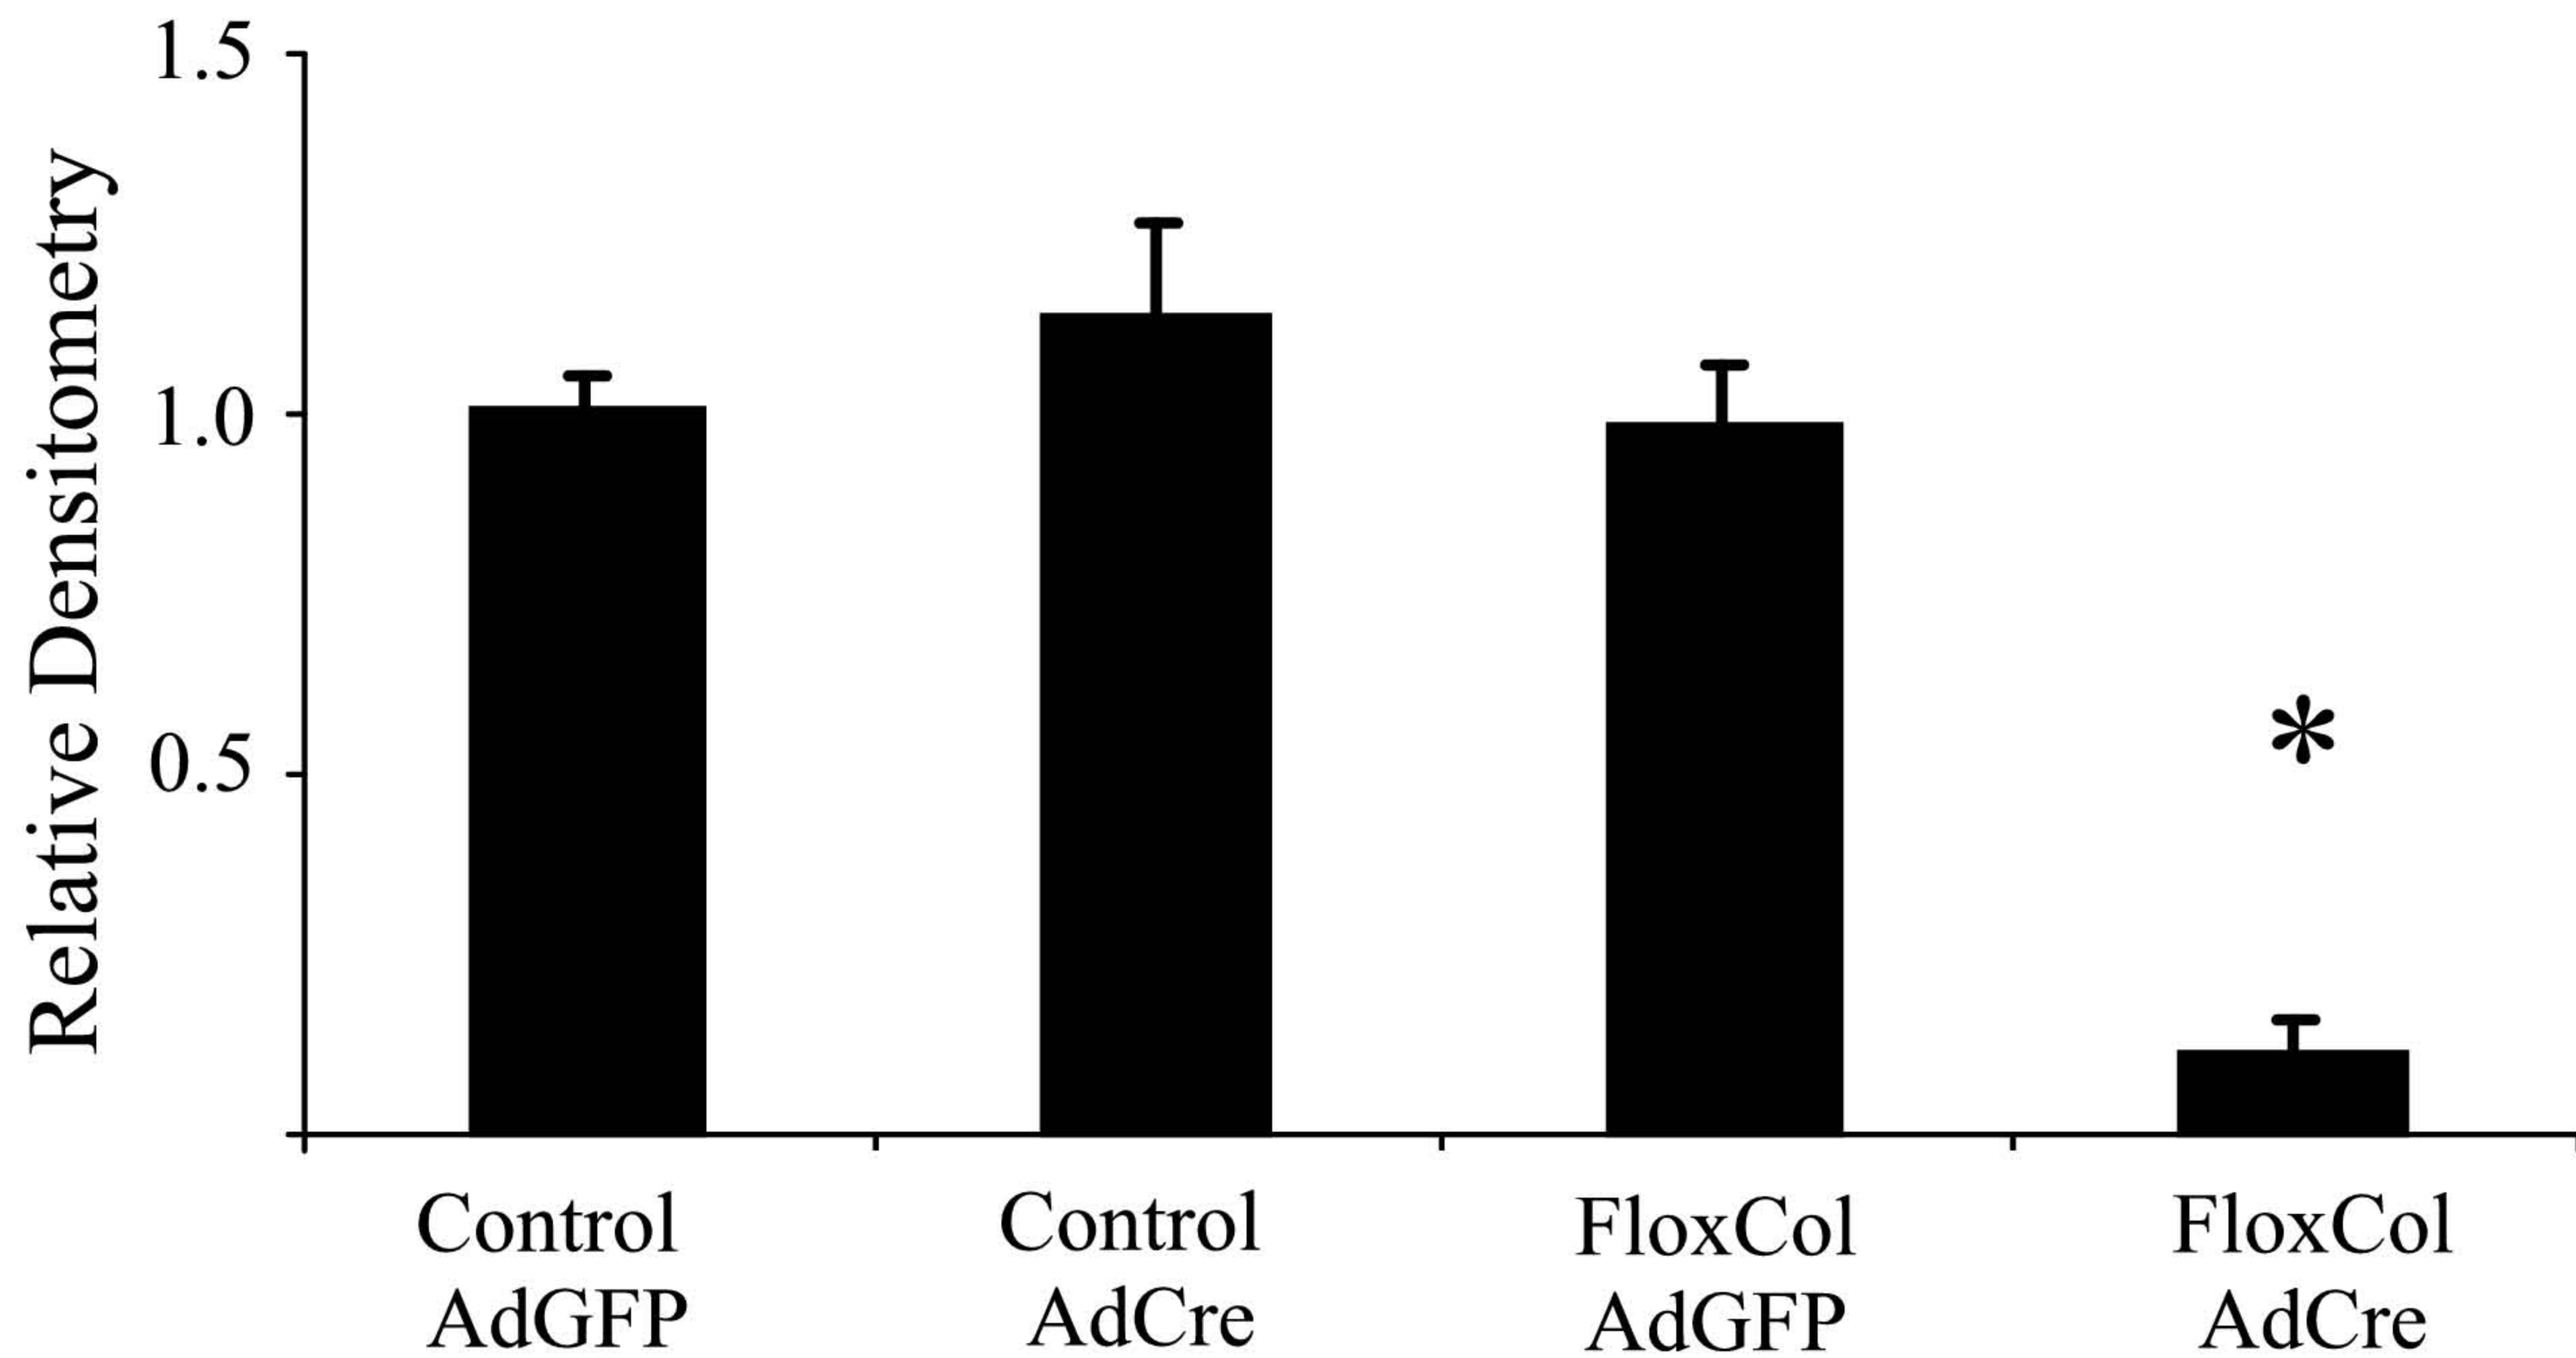**B.**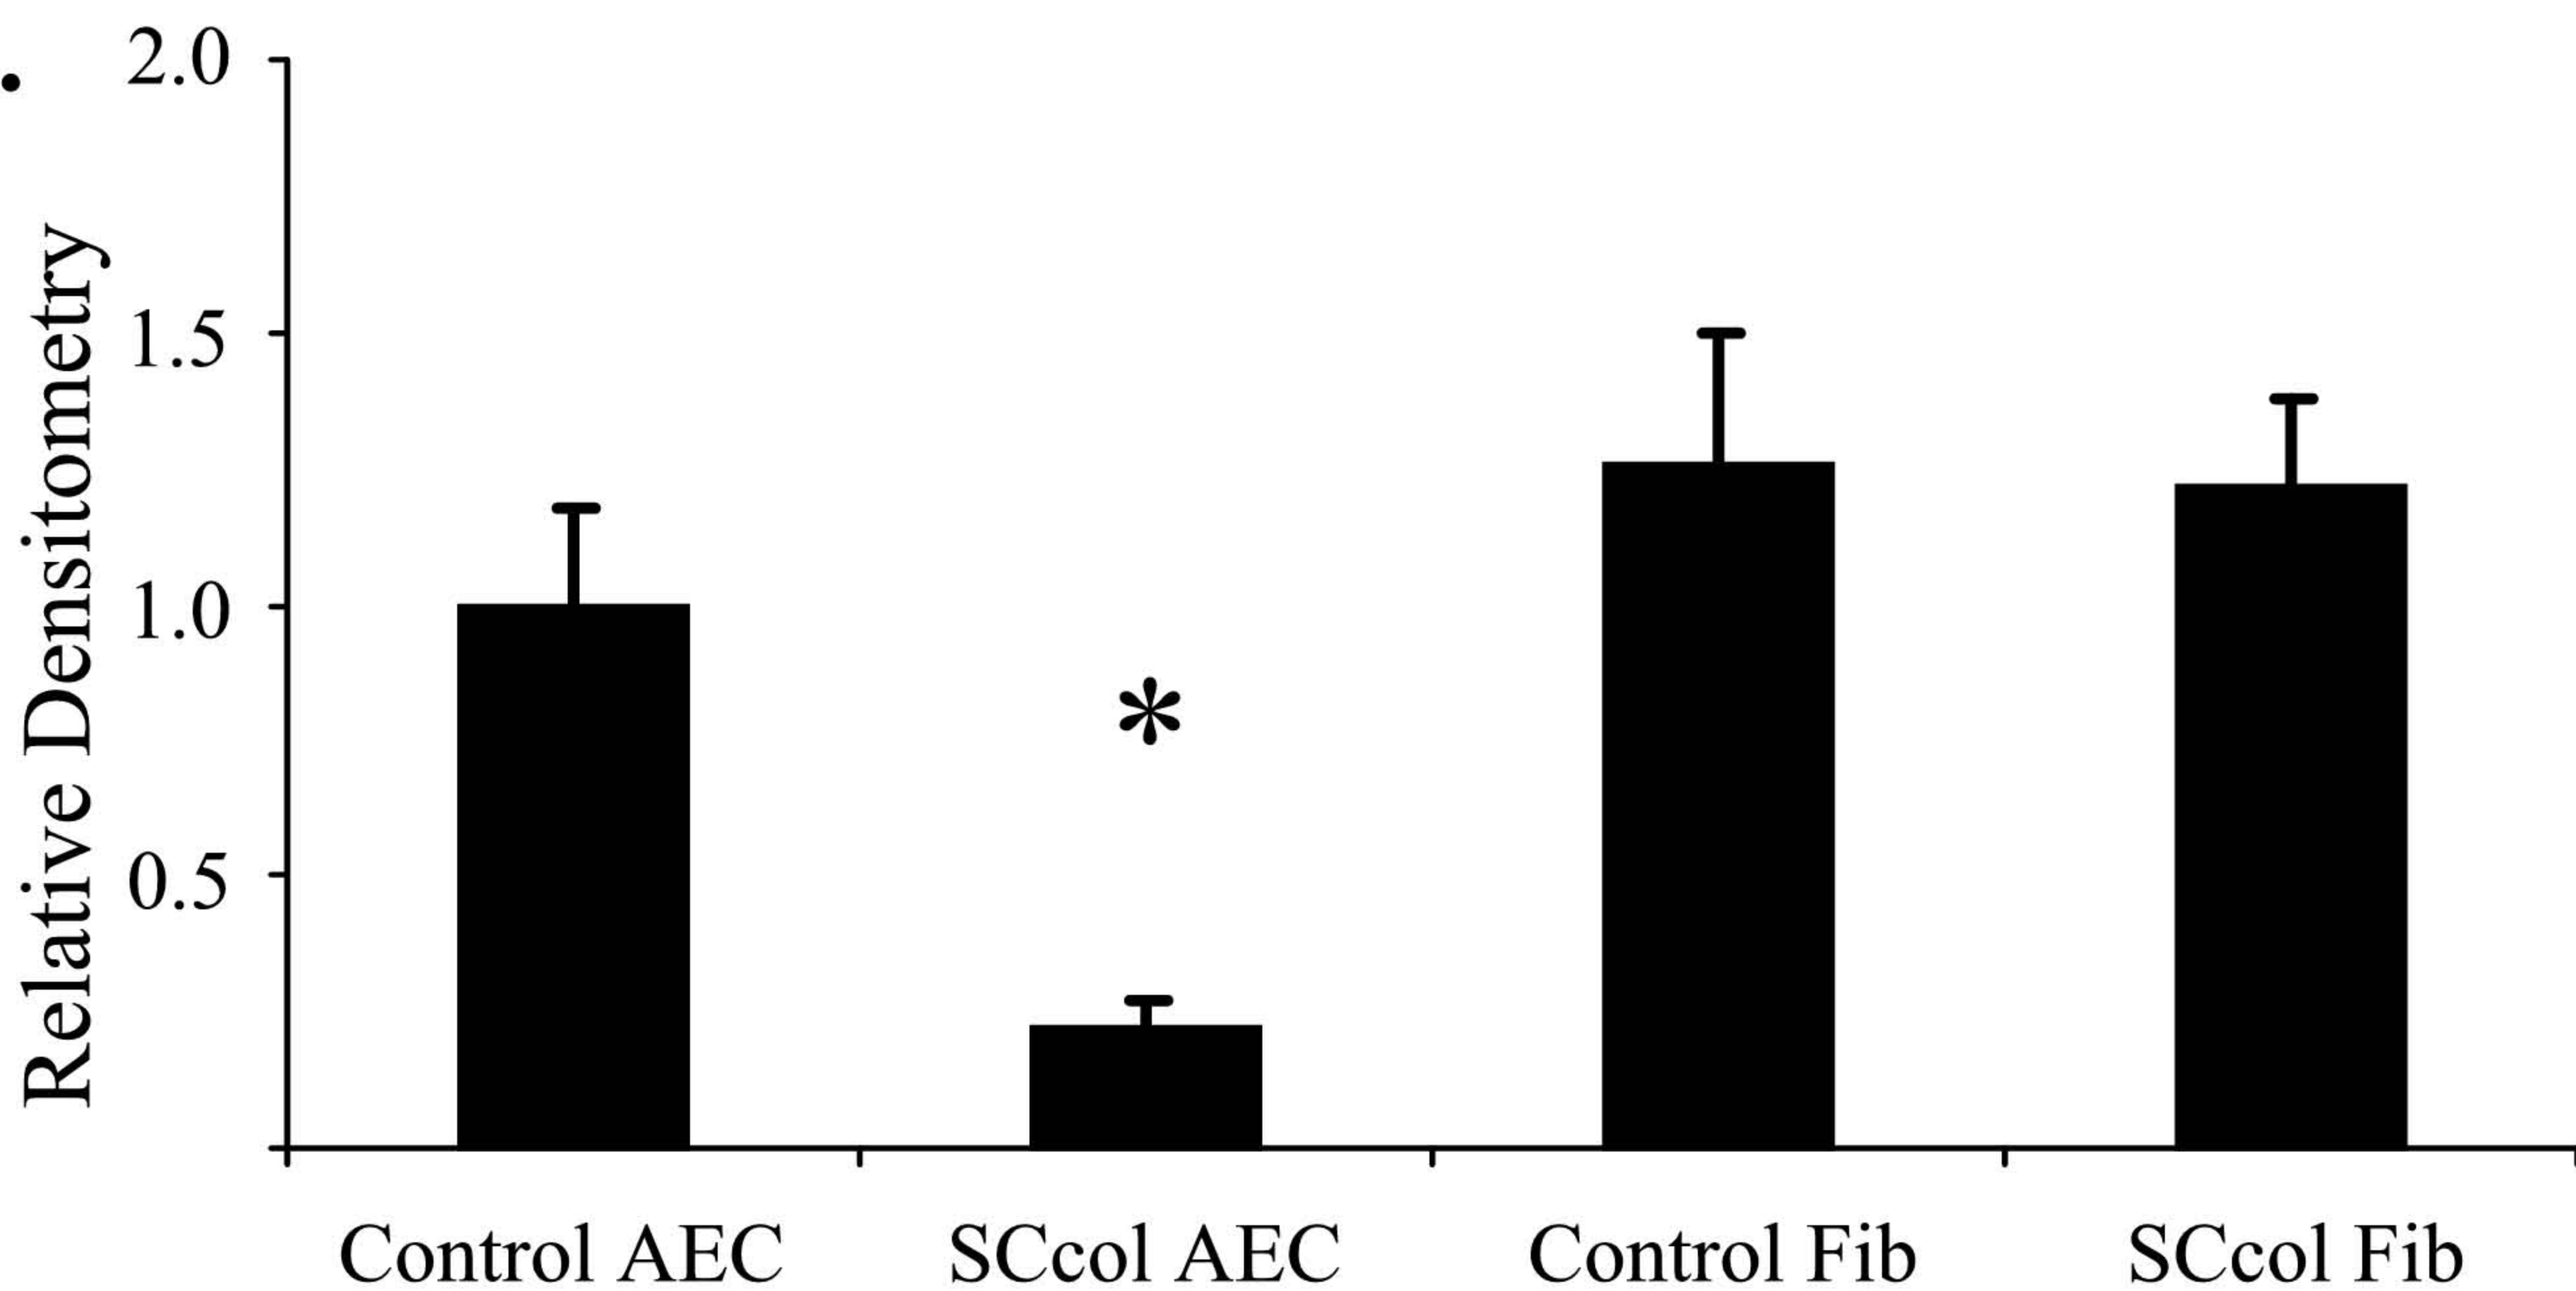

Supplement: mmc2.pdf [file mmc2.pdf]

**A. Control**

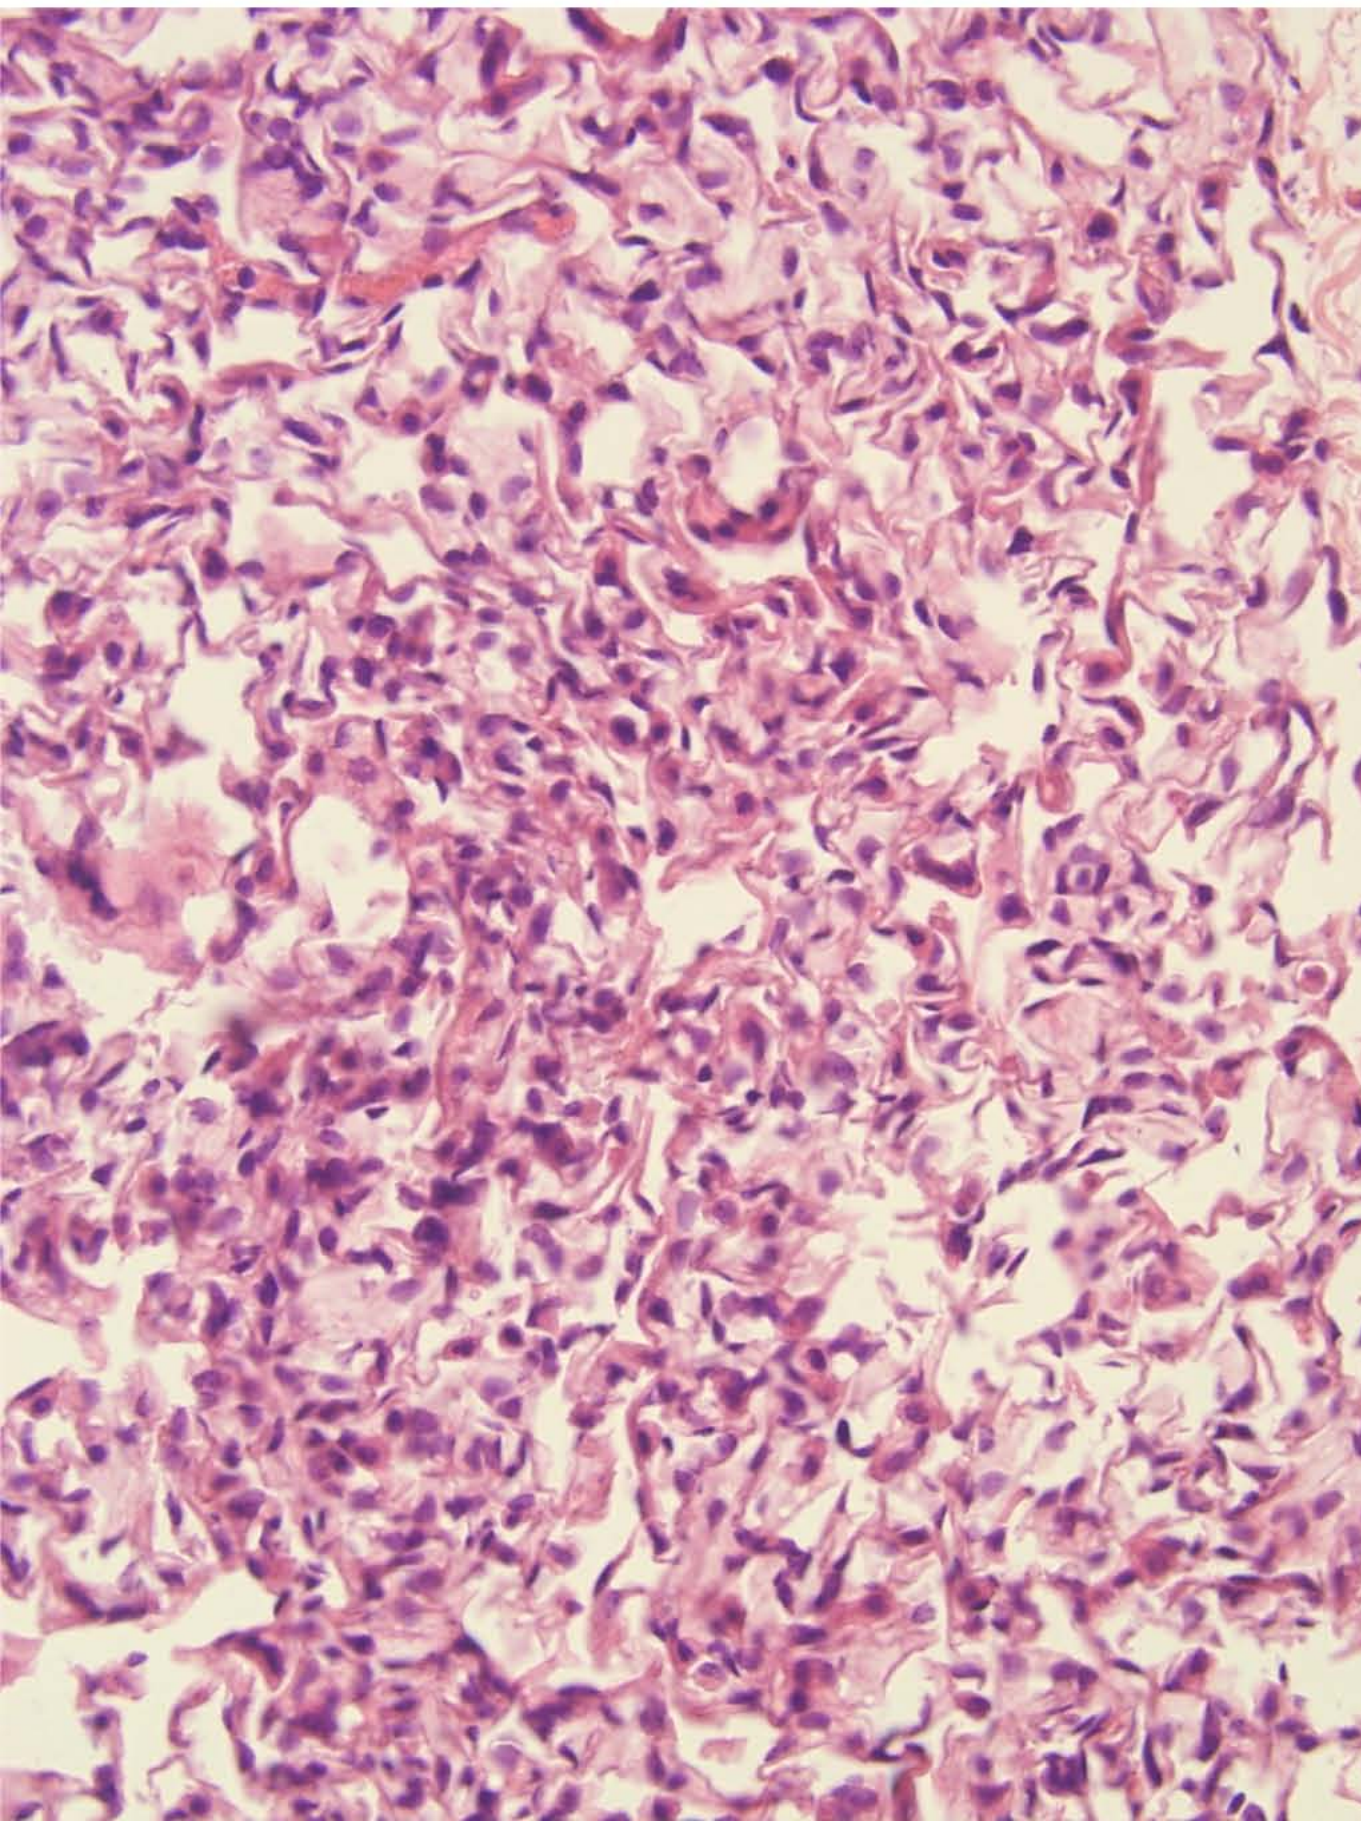

**B. SCcol**

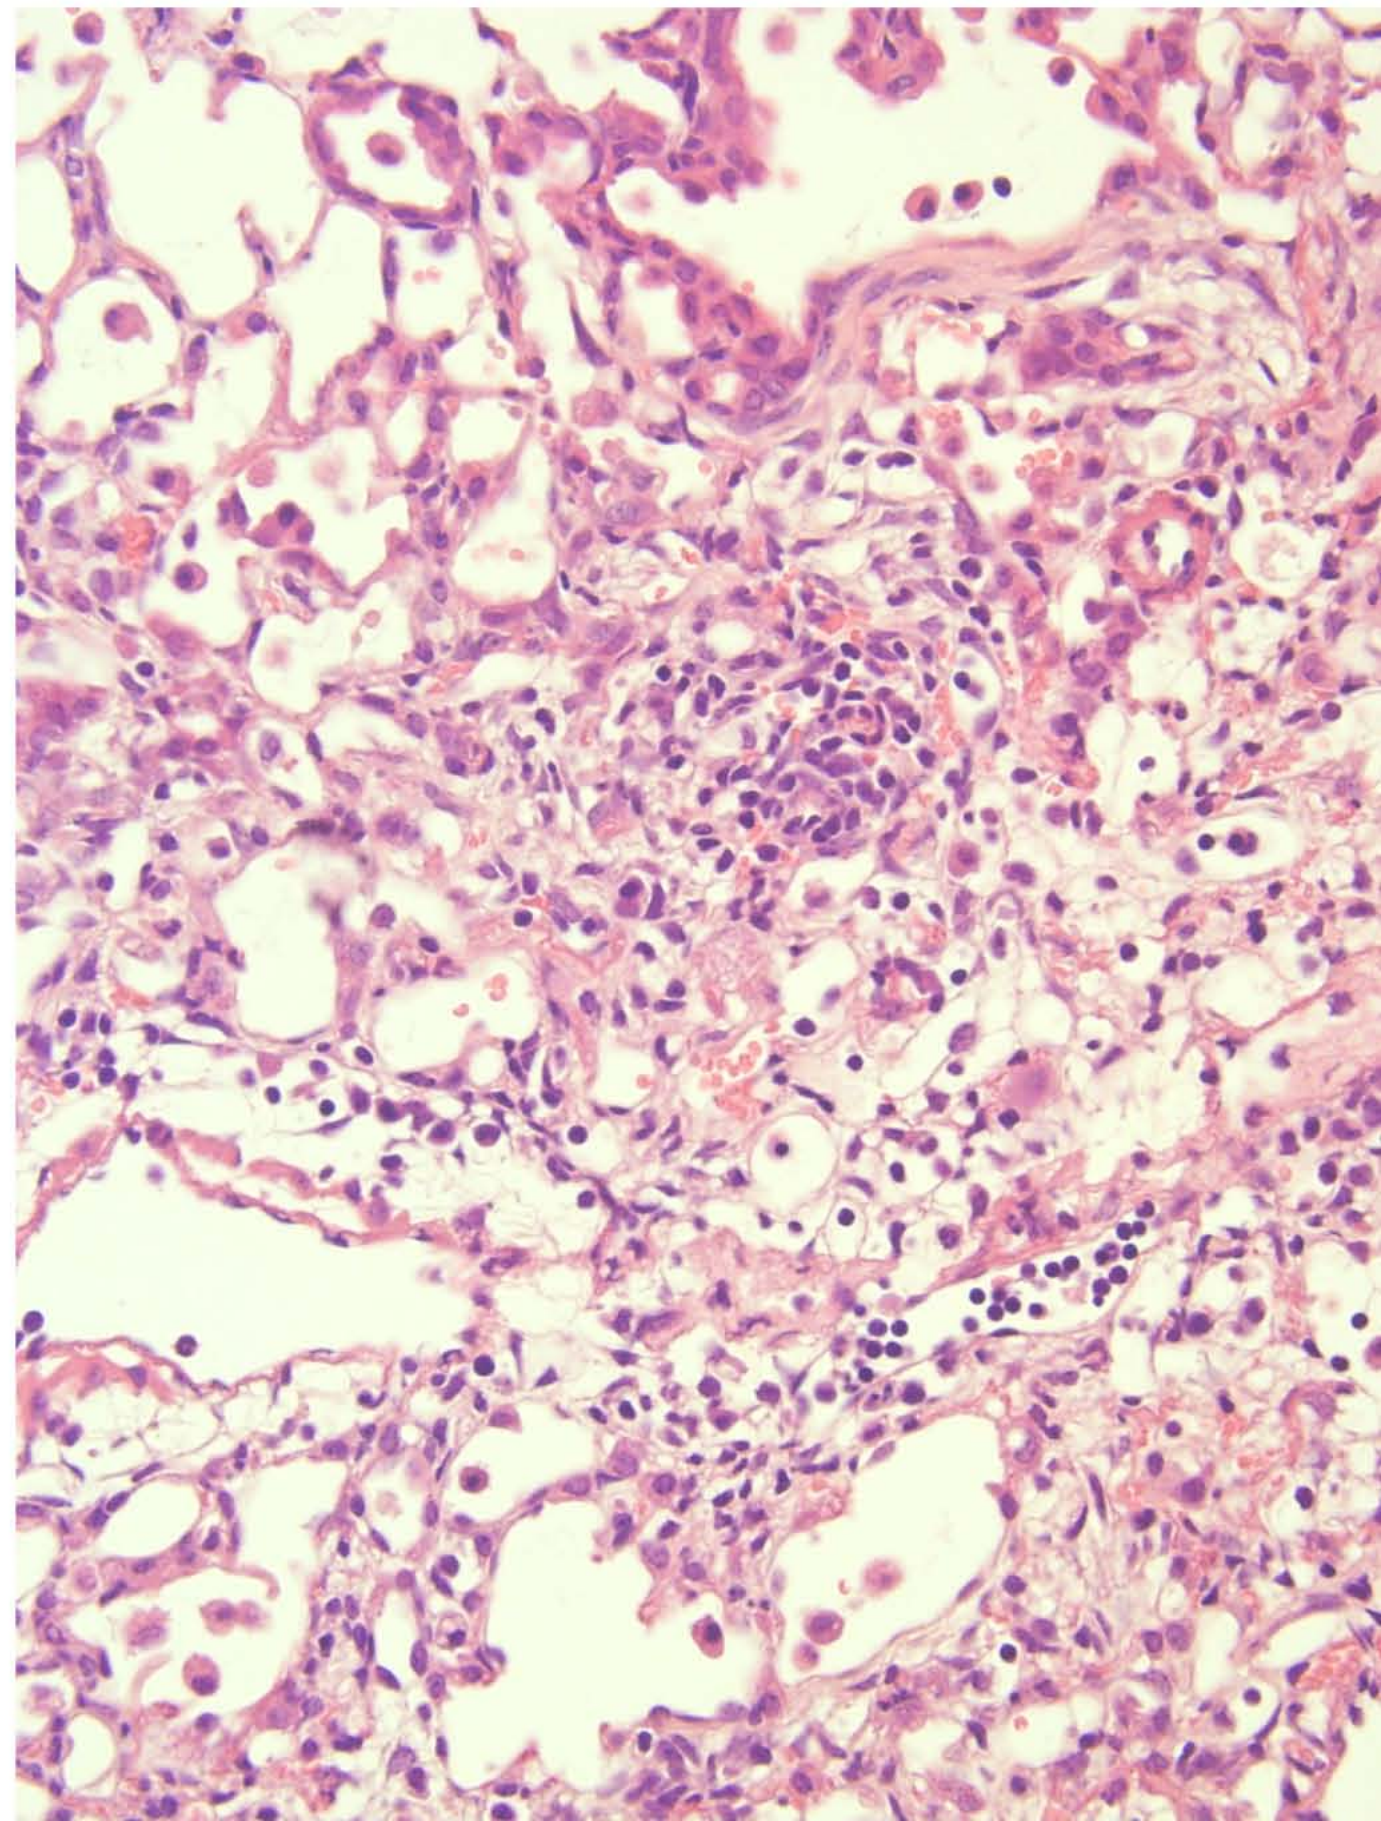

Supplement: mmc3.pdf [file mmc3.pdf]

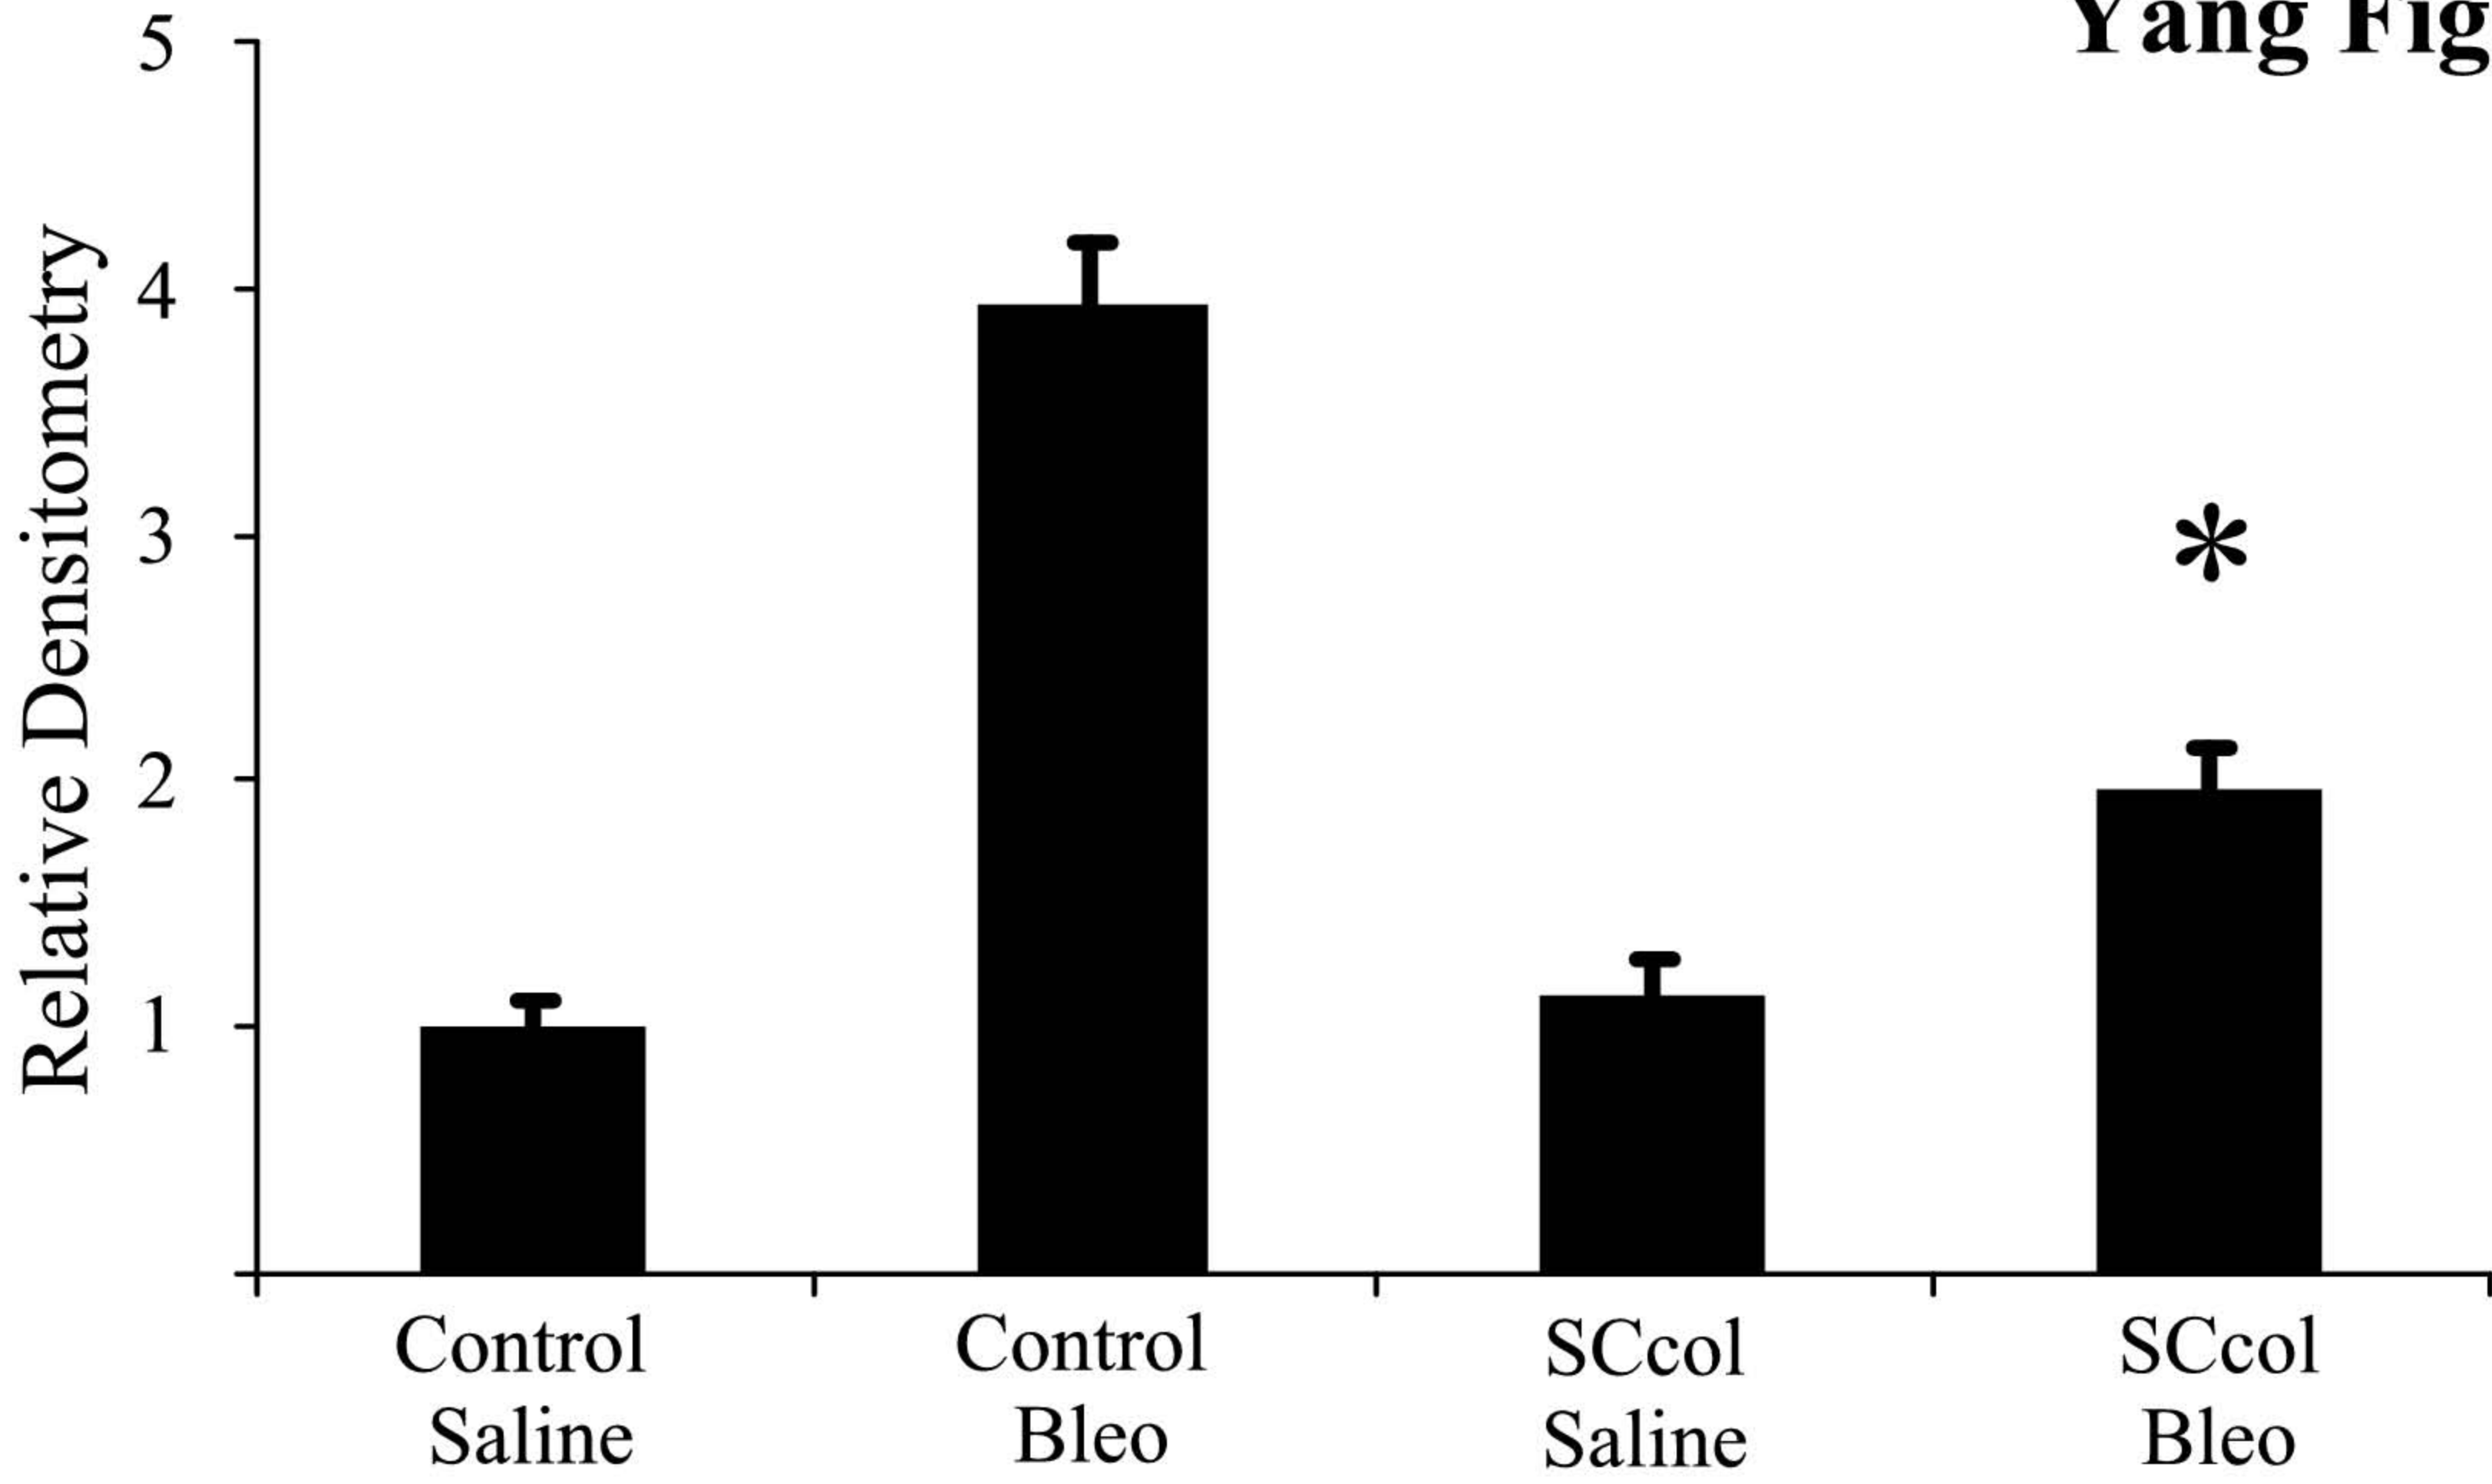

Supplement: mmc4.pdf [file mmc4.pdf]

**A. Control**

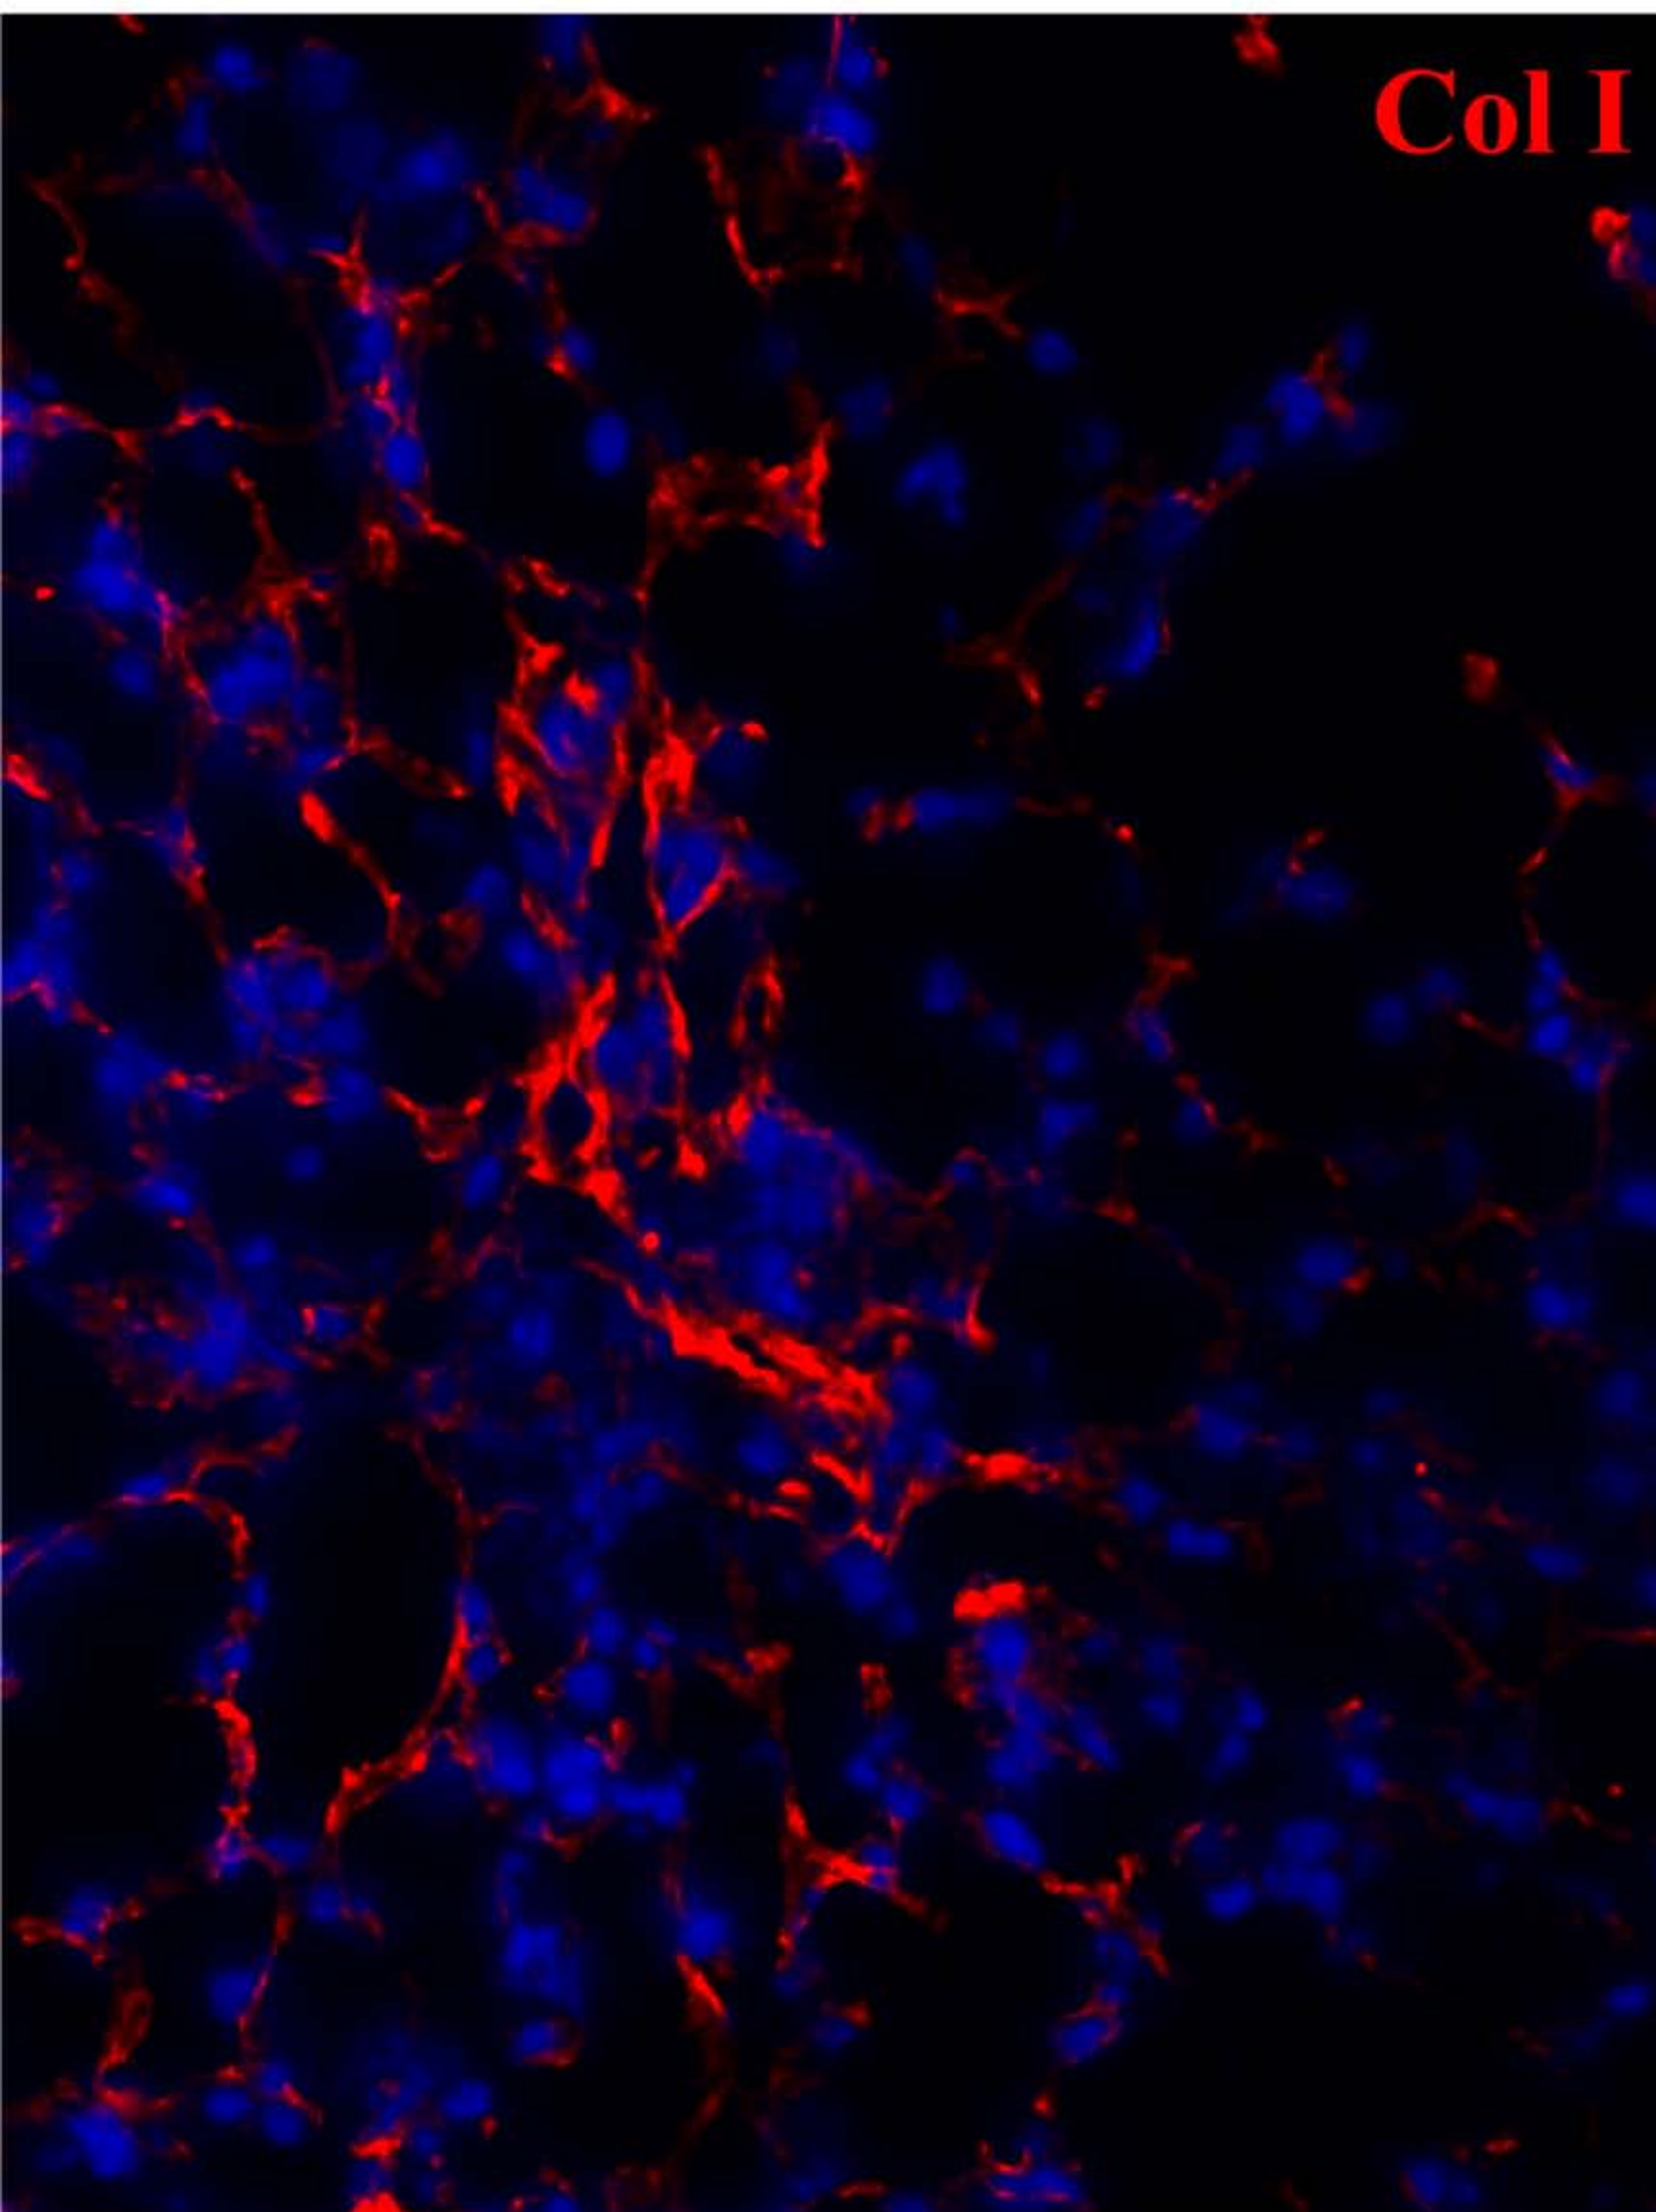

**B. SCcol**

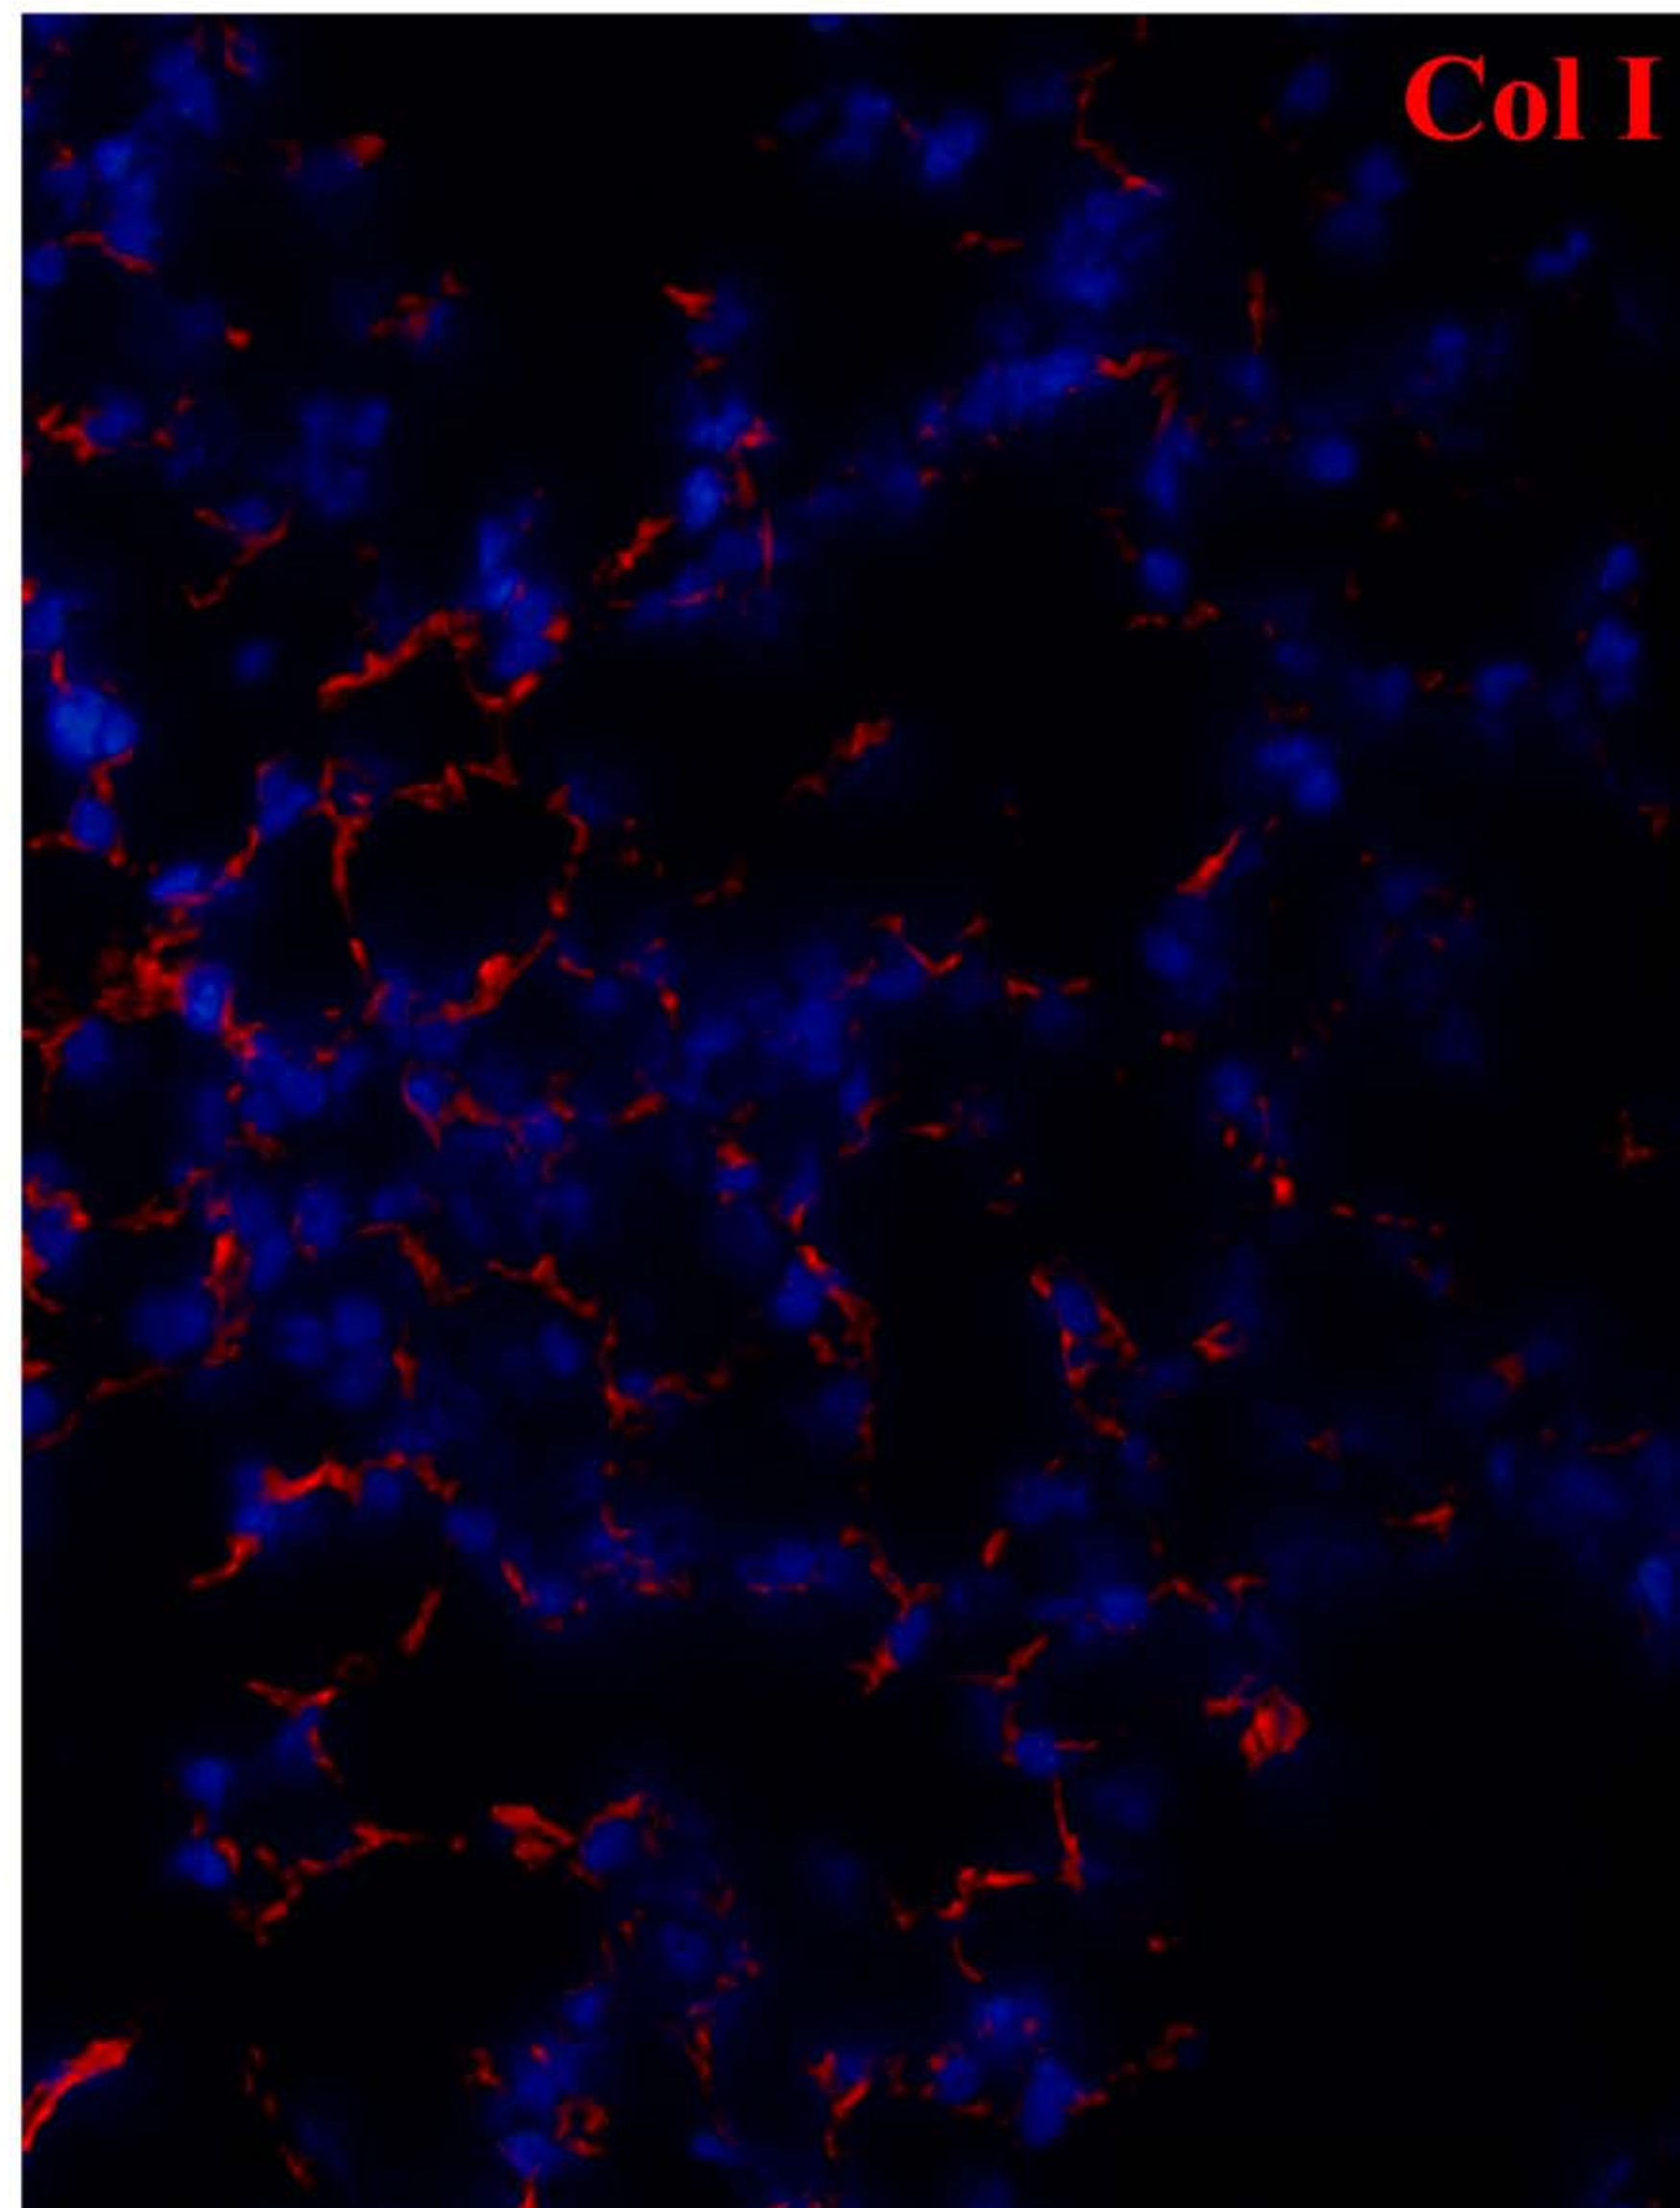

Supplement: mmc5.pdf [file mmc5.pdf]

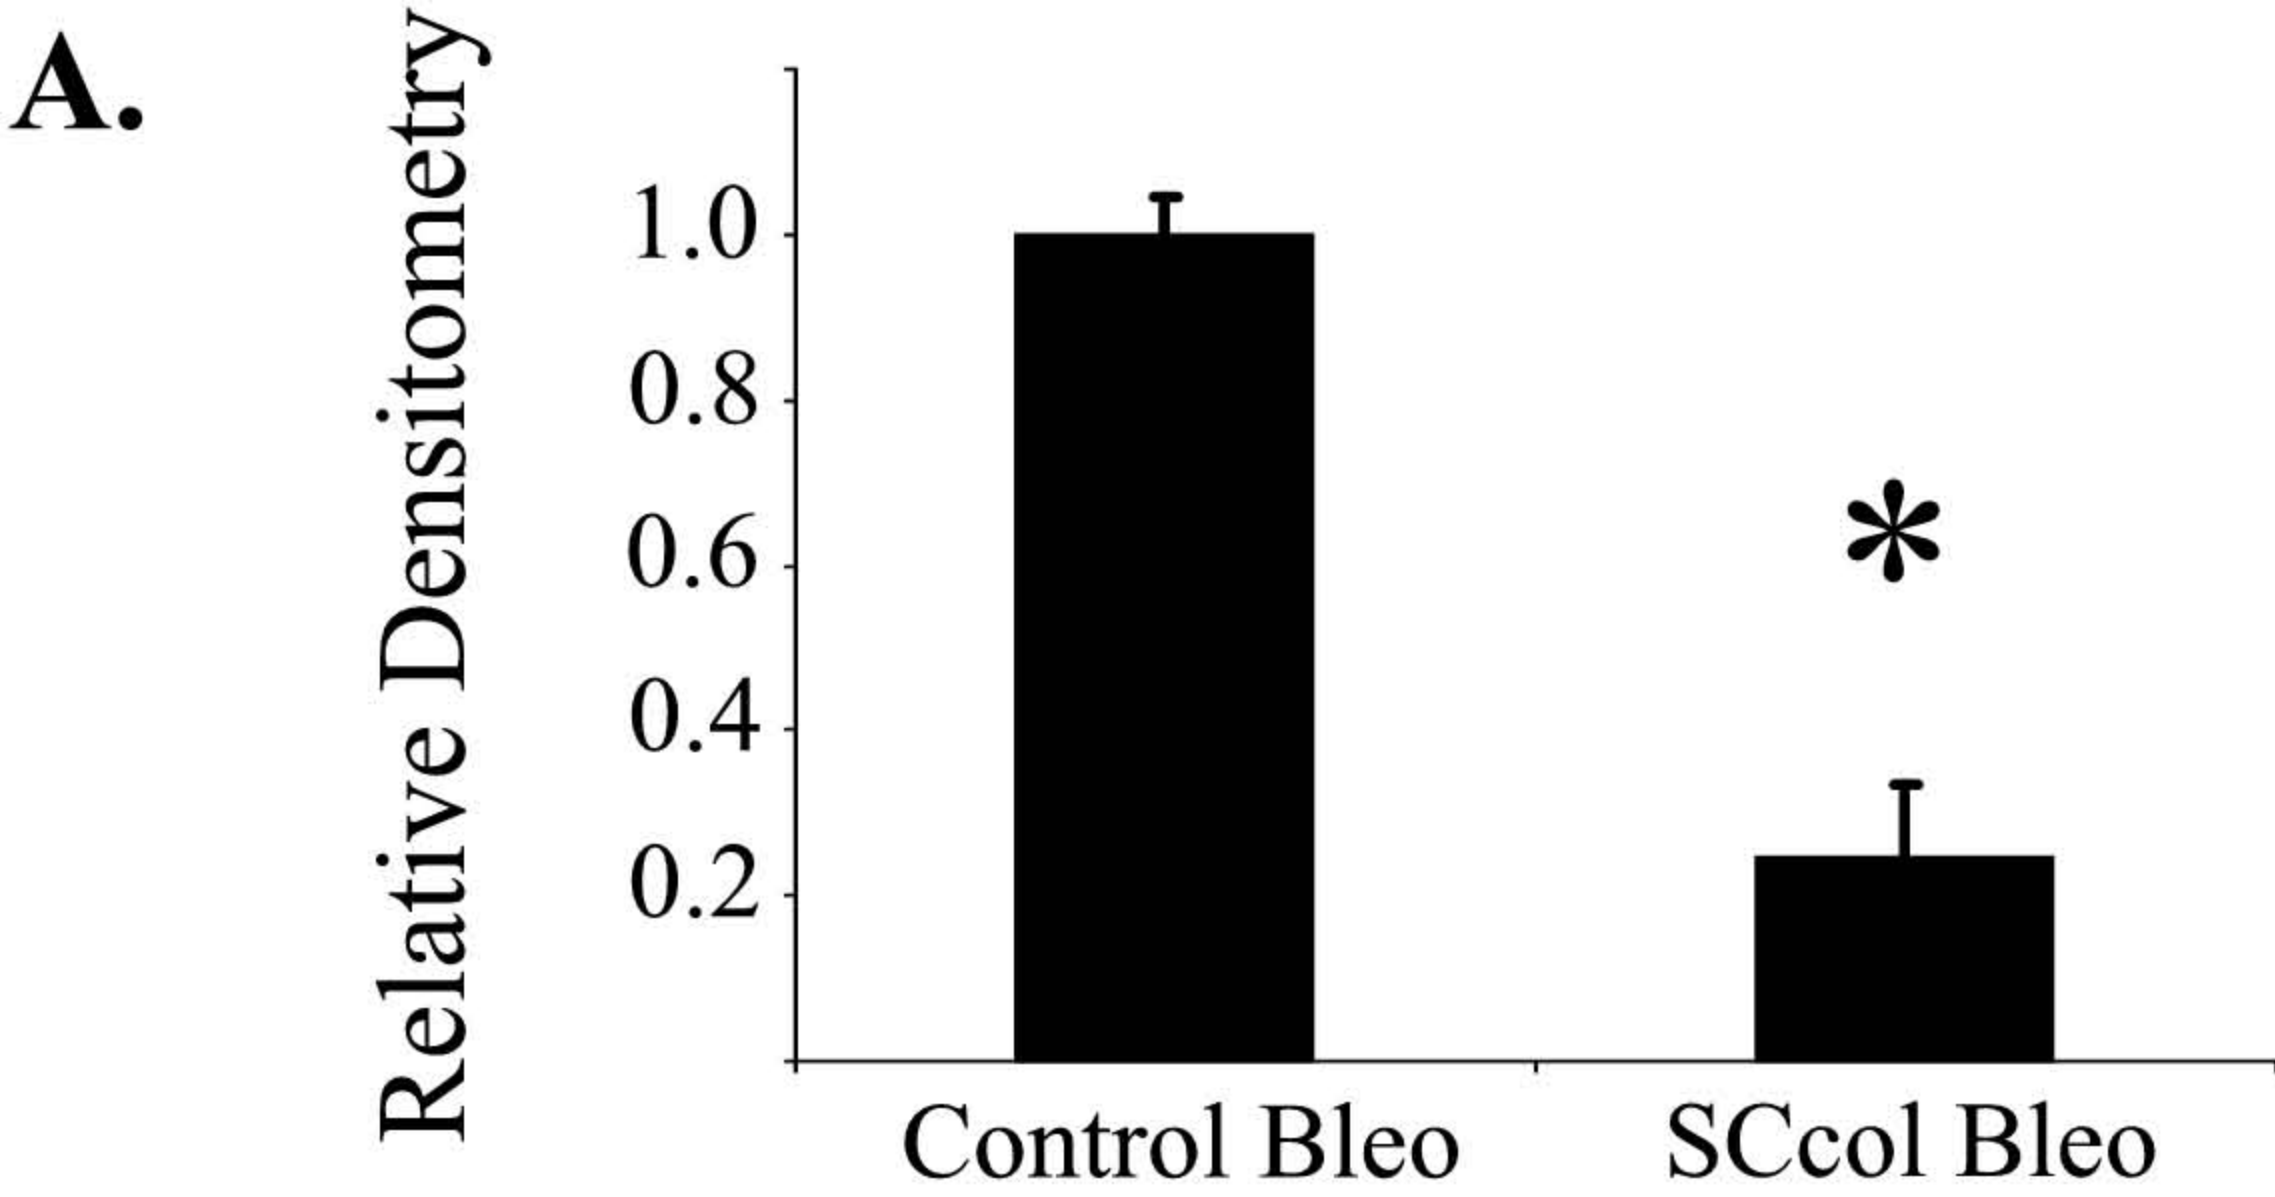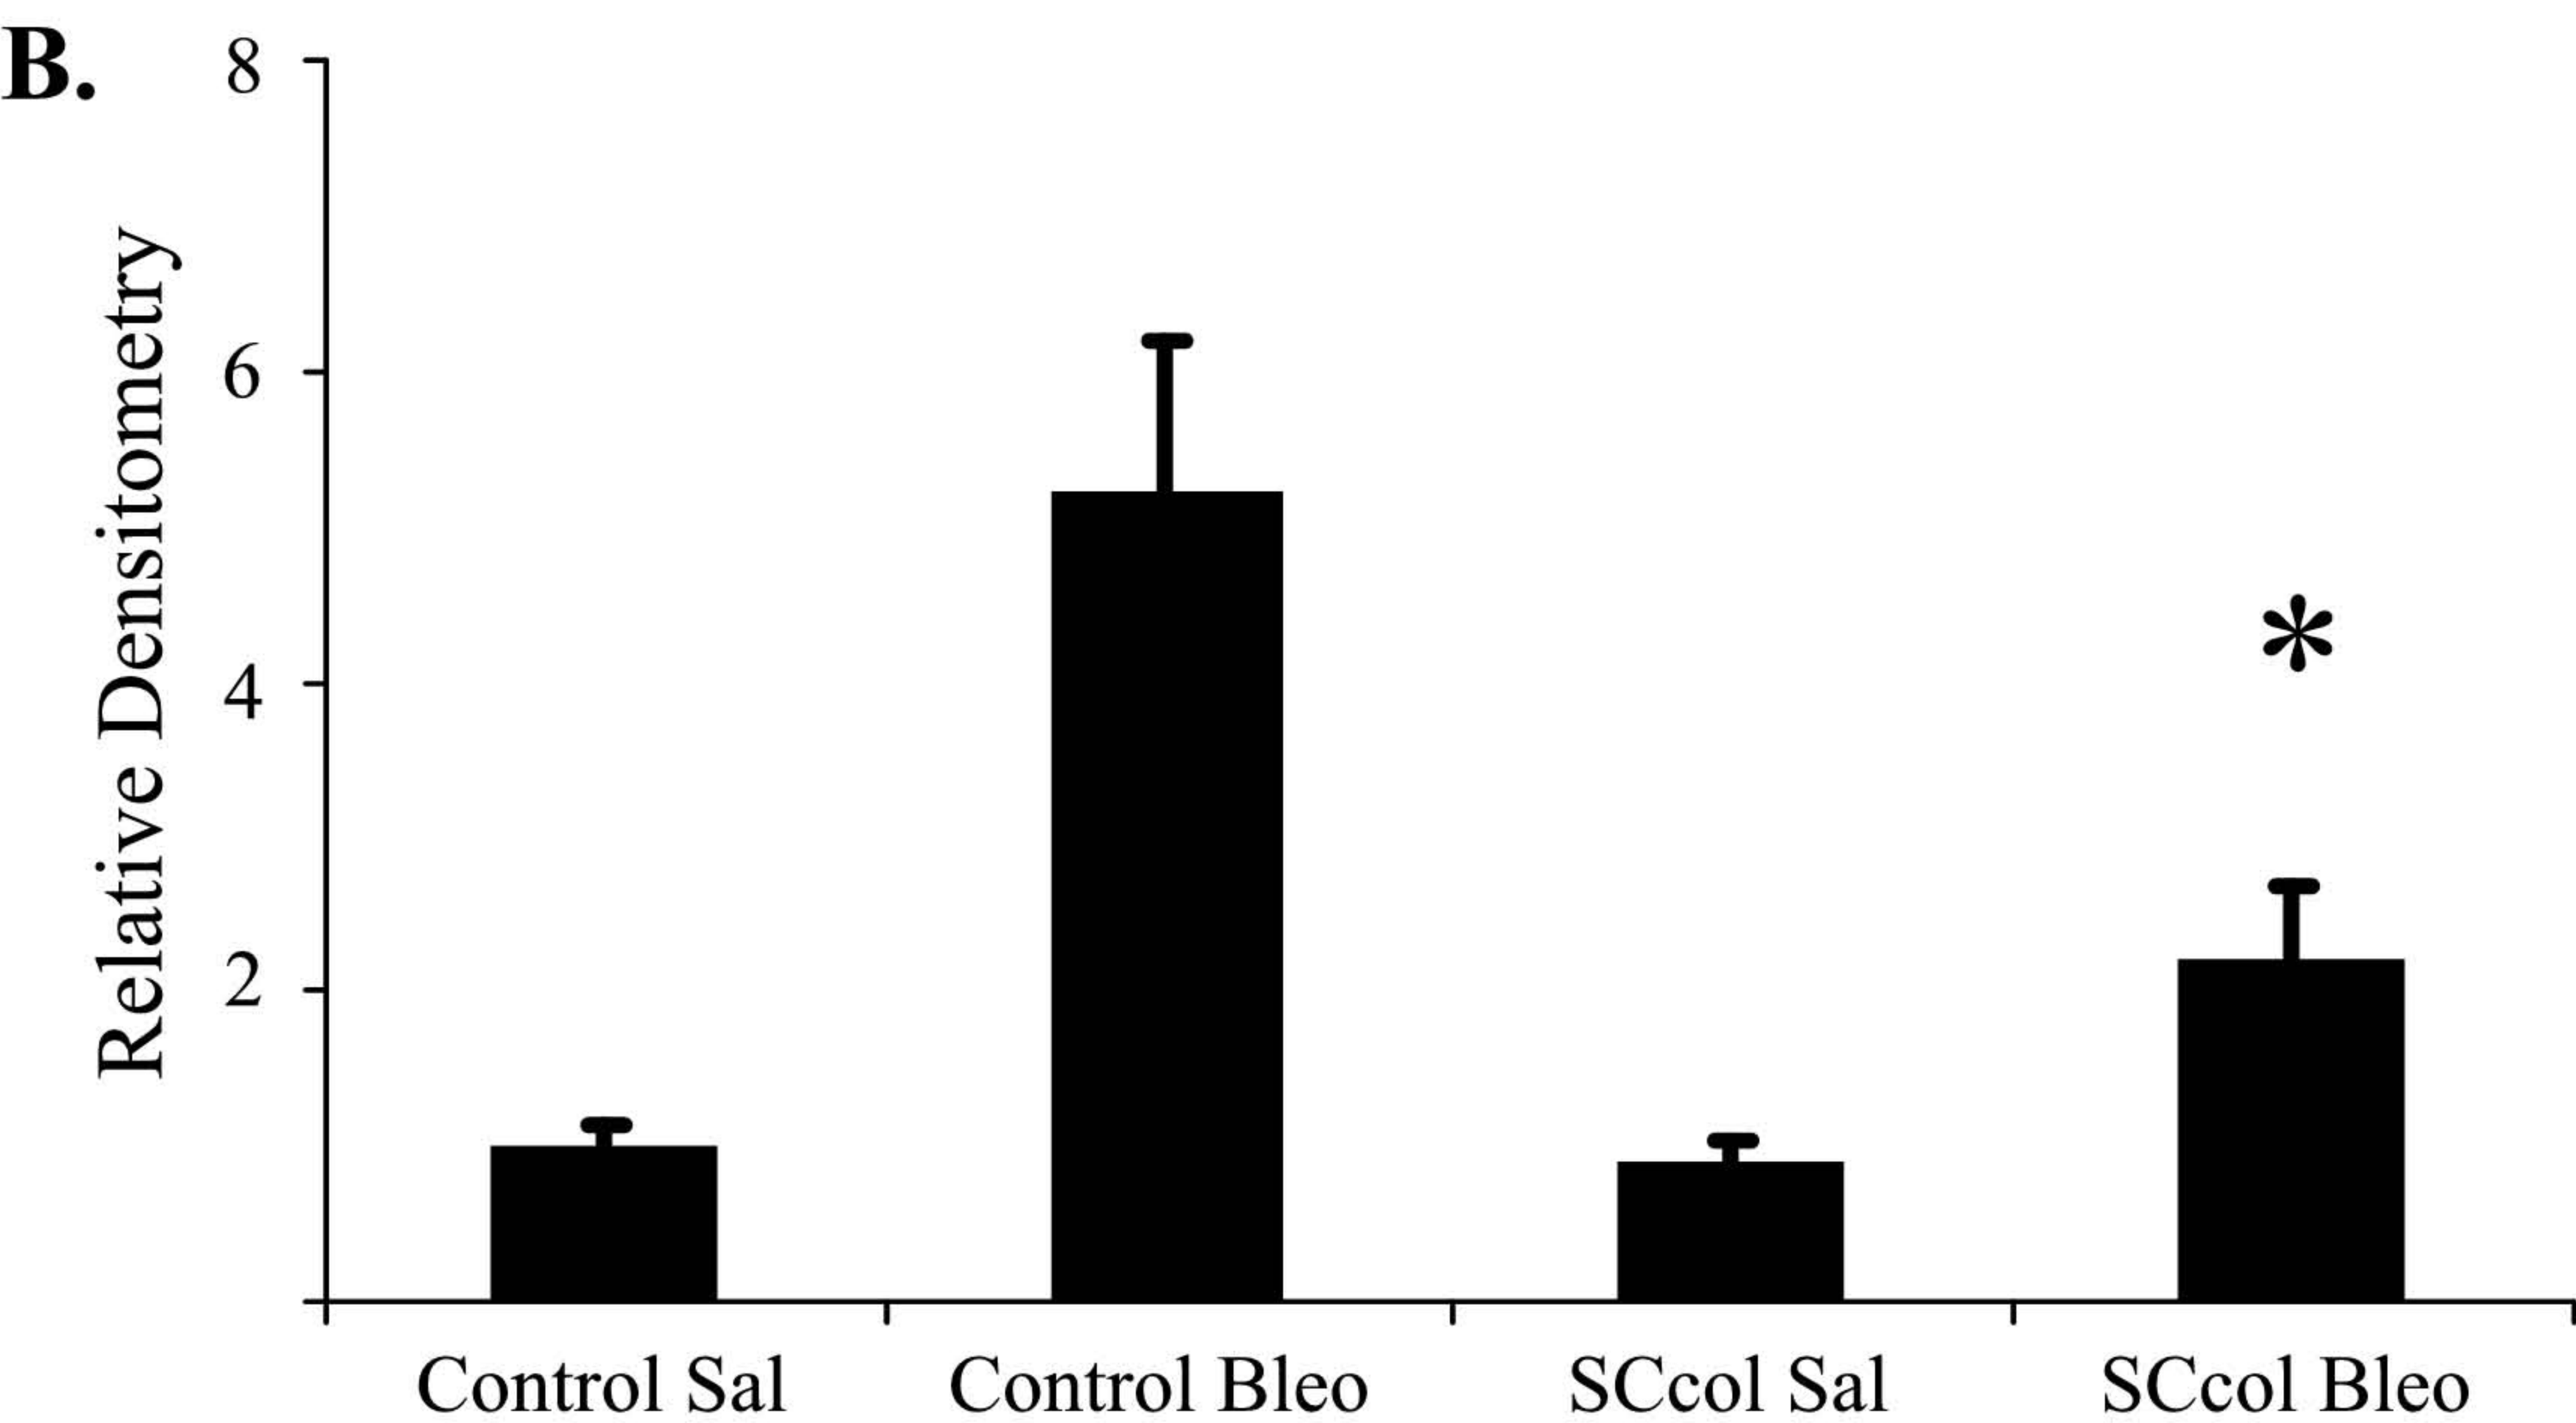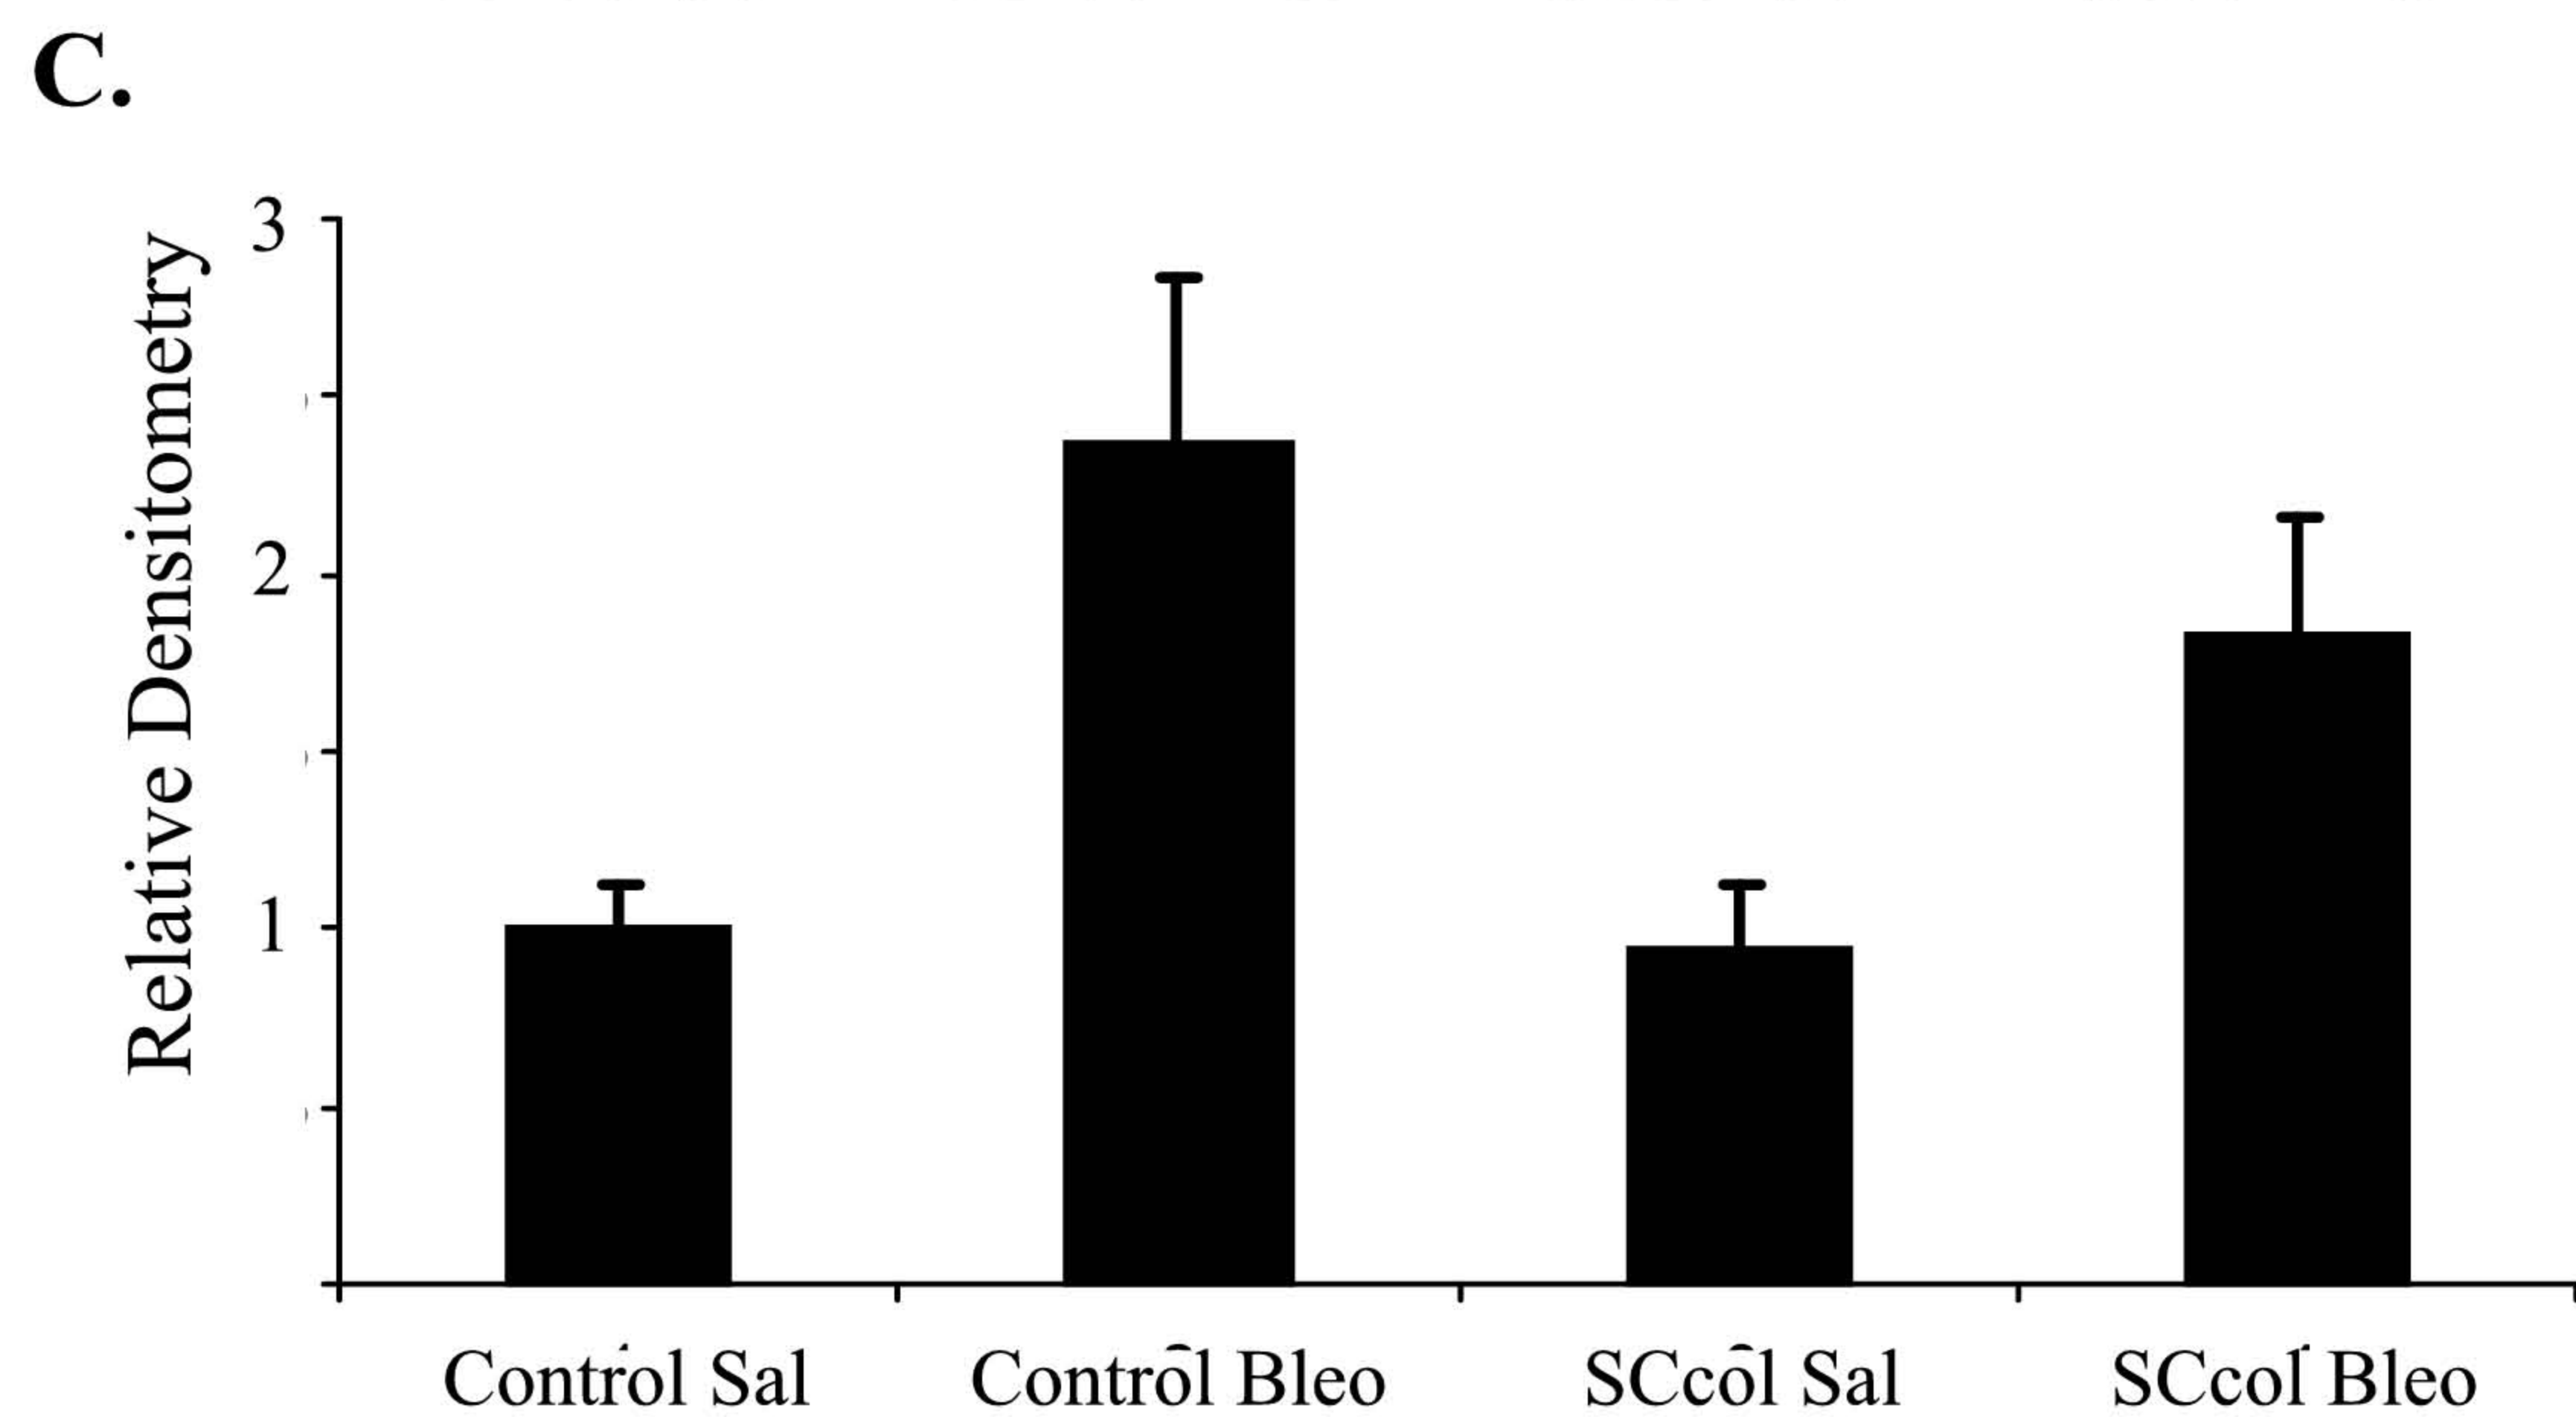

Supplement: mmc6.pdf [file mmc6.pdf]

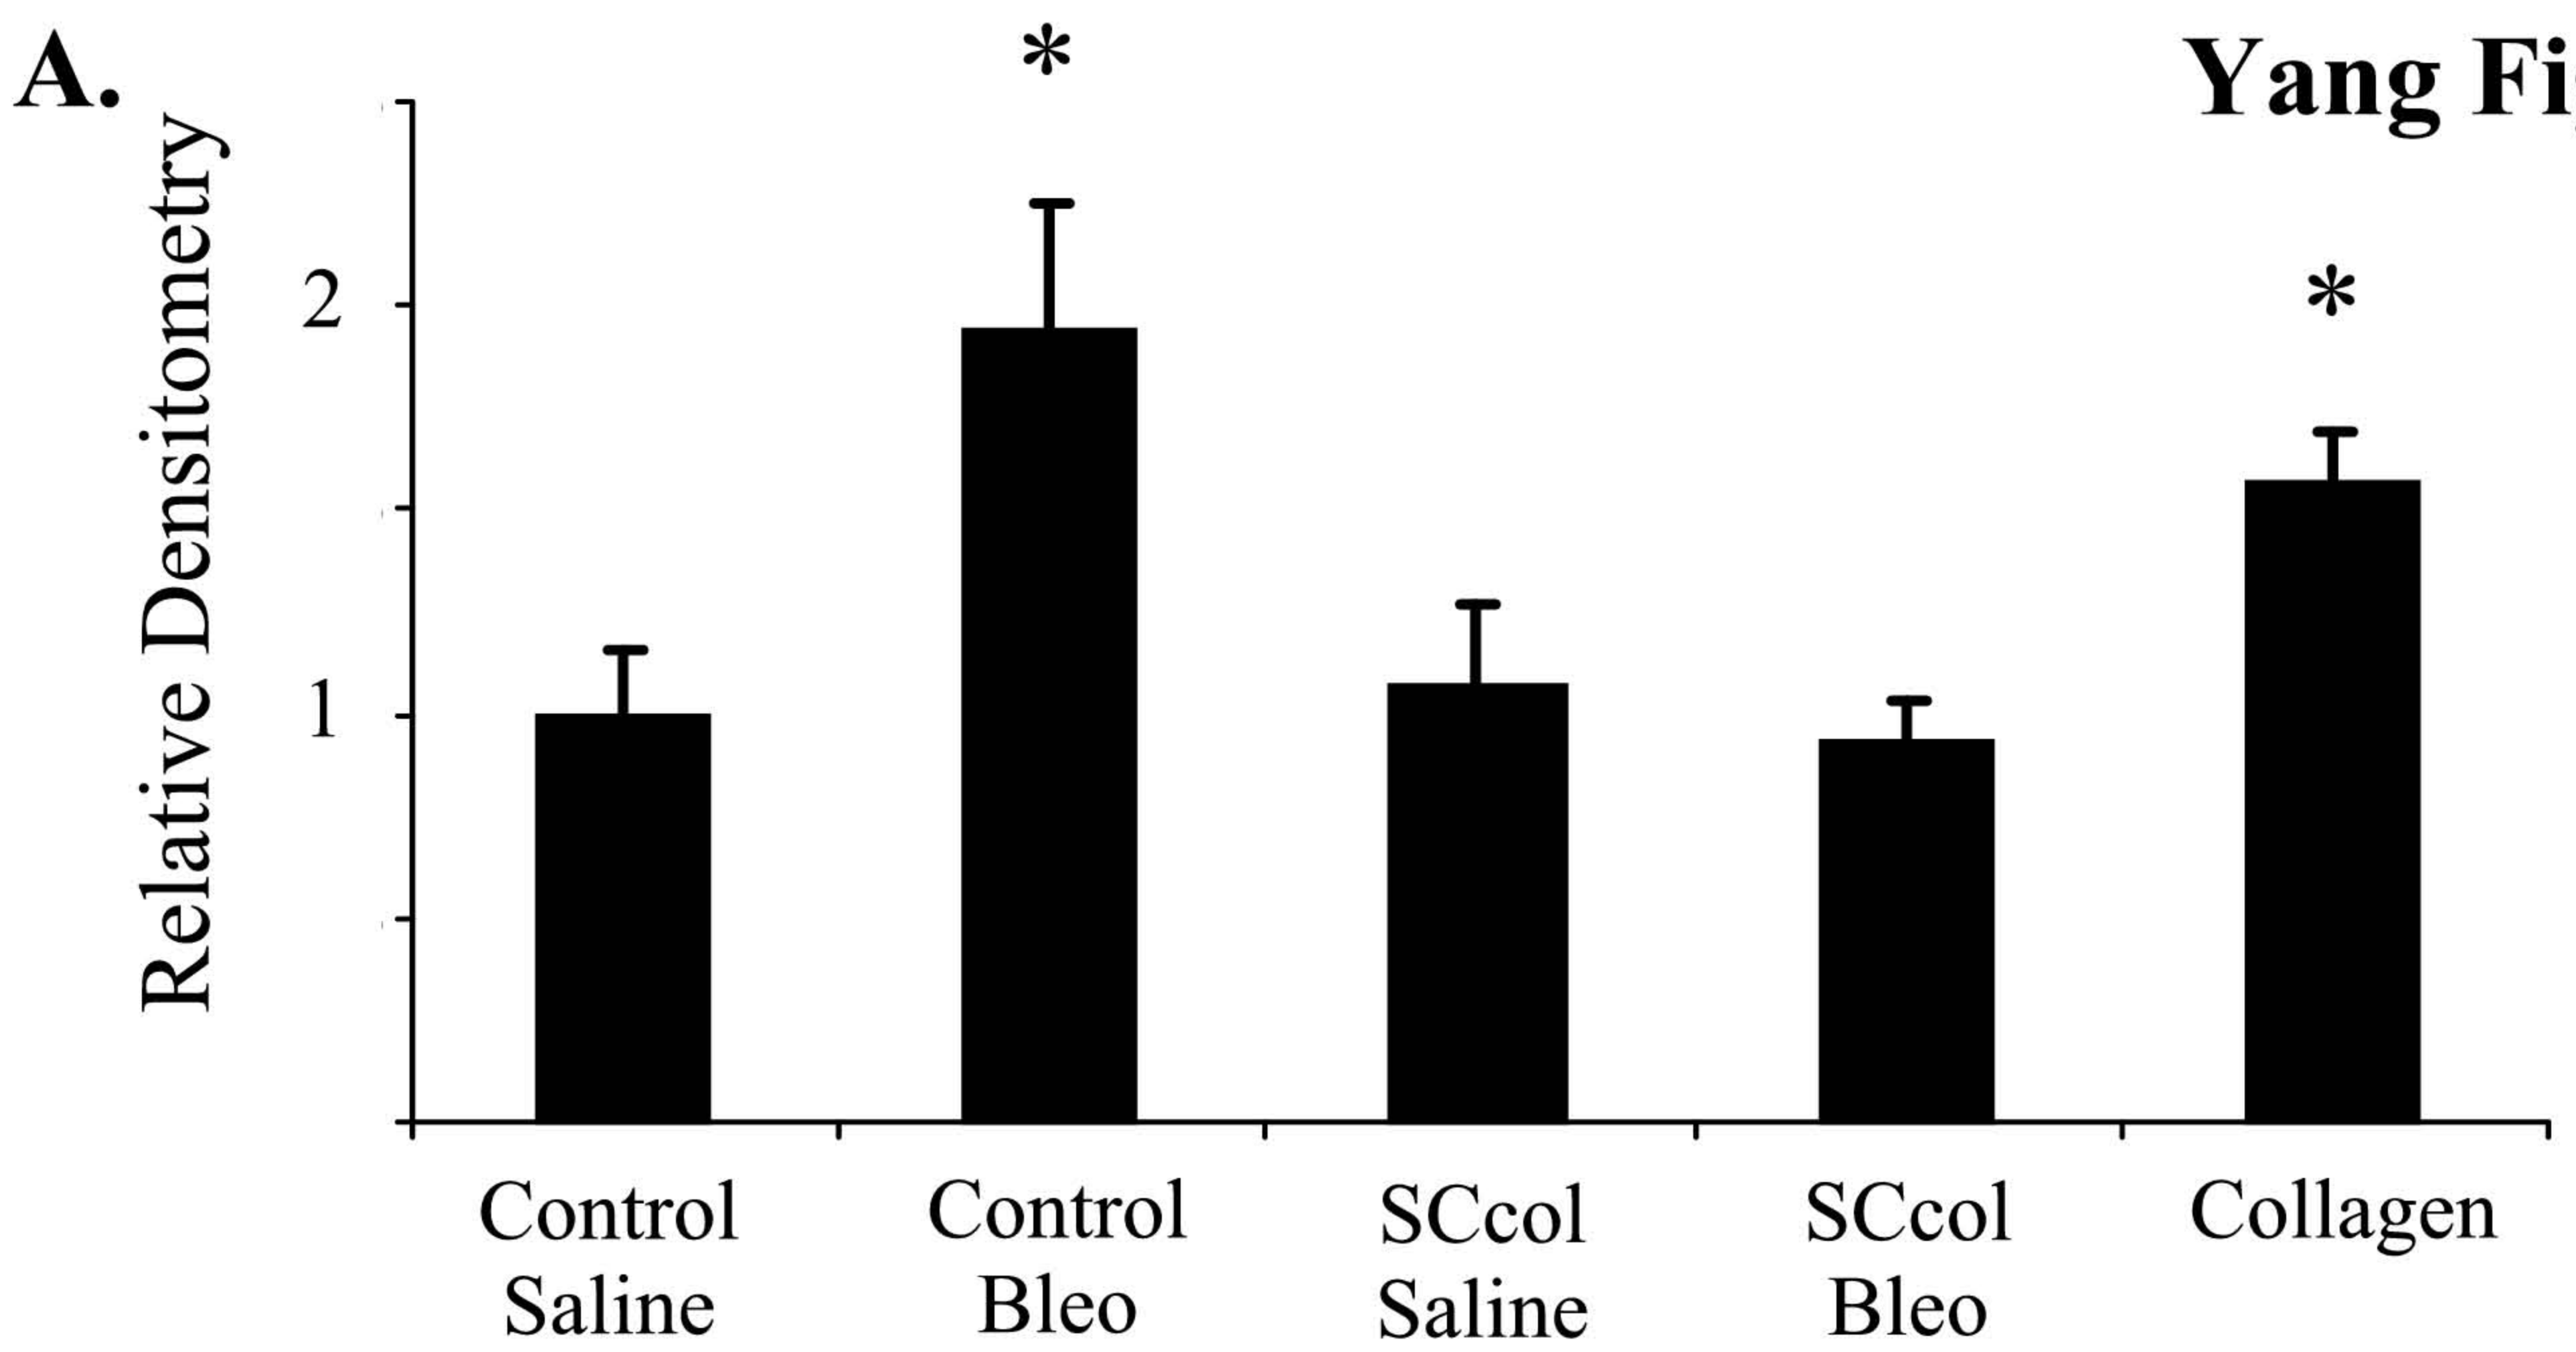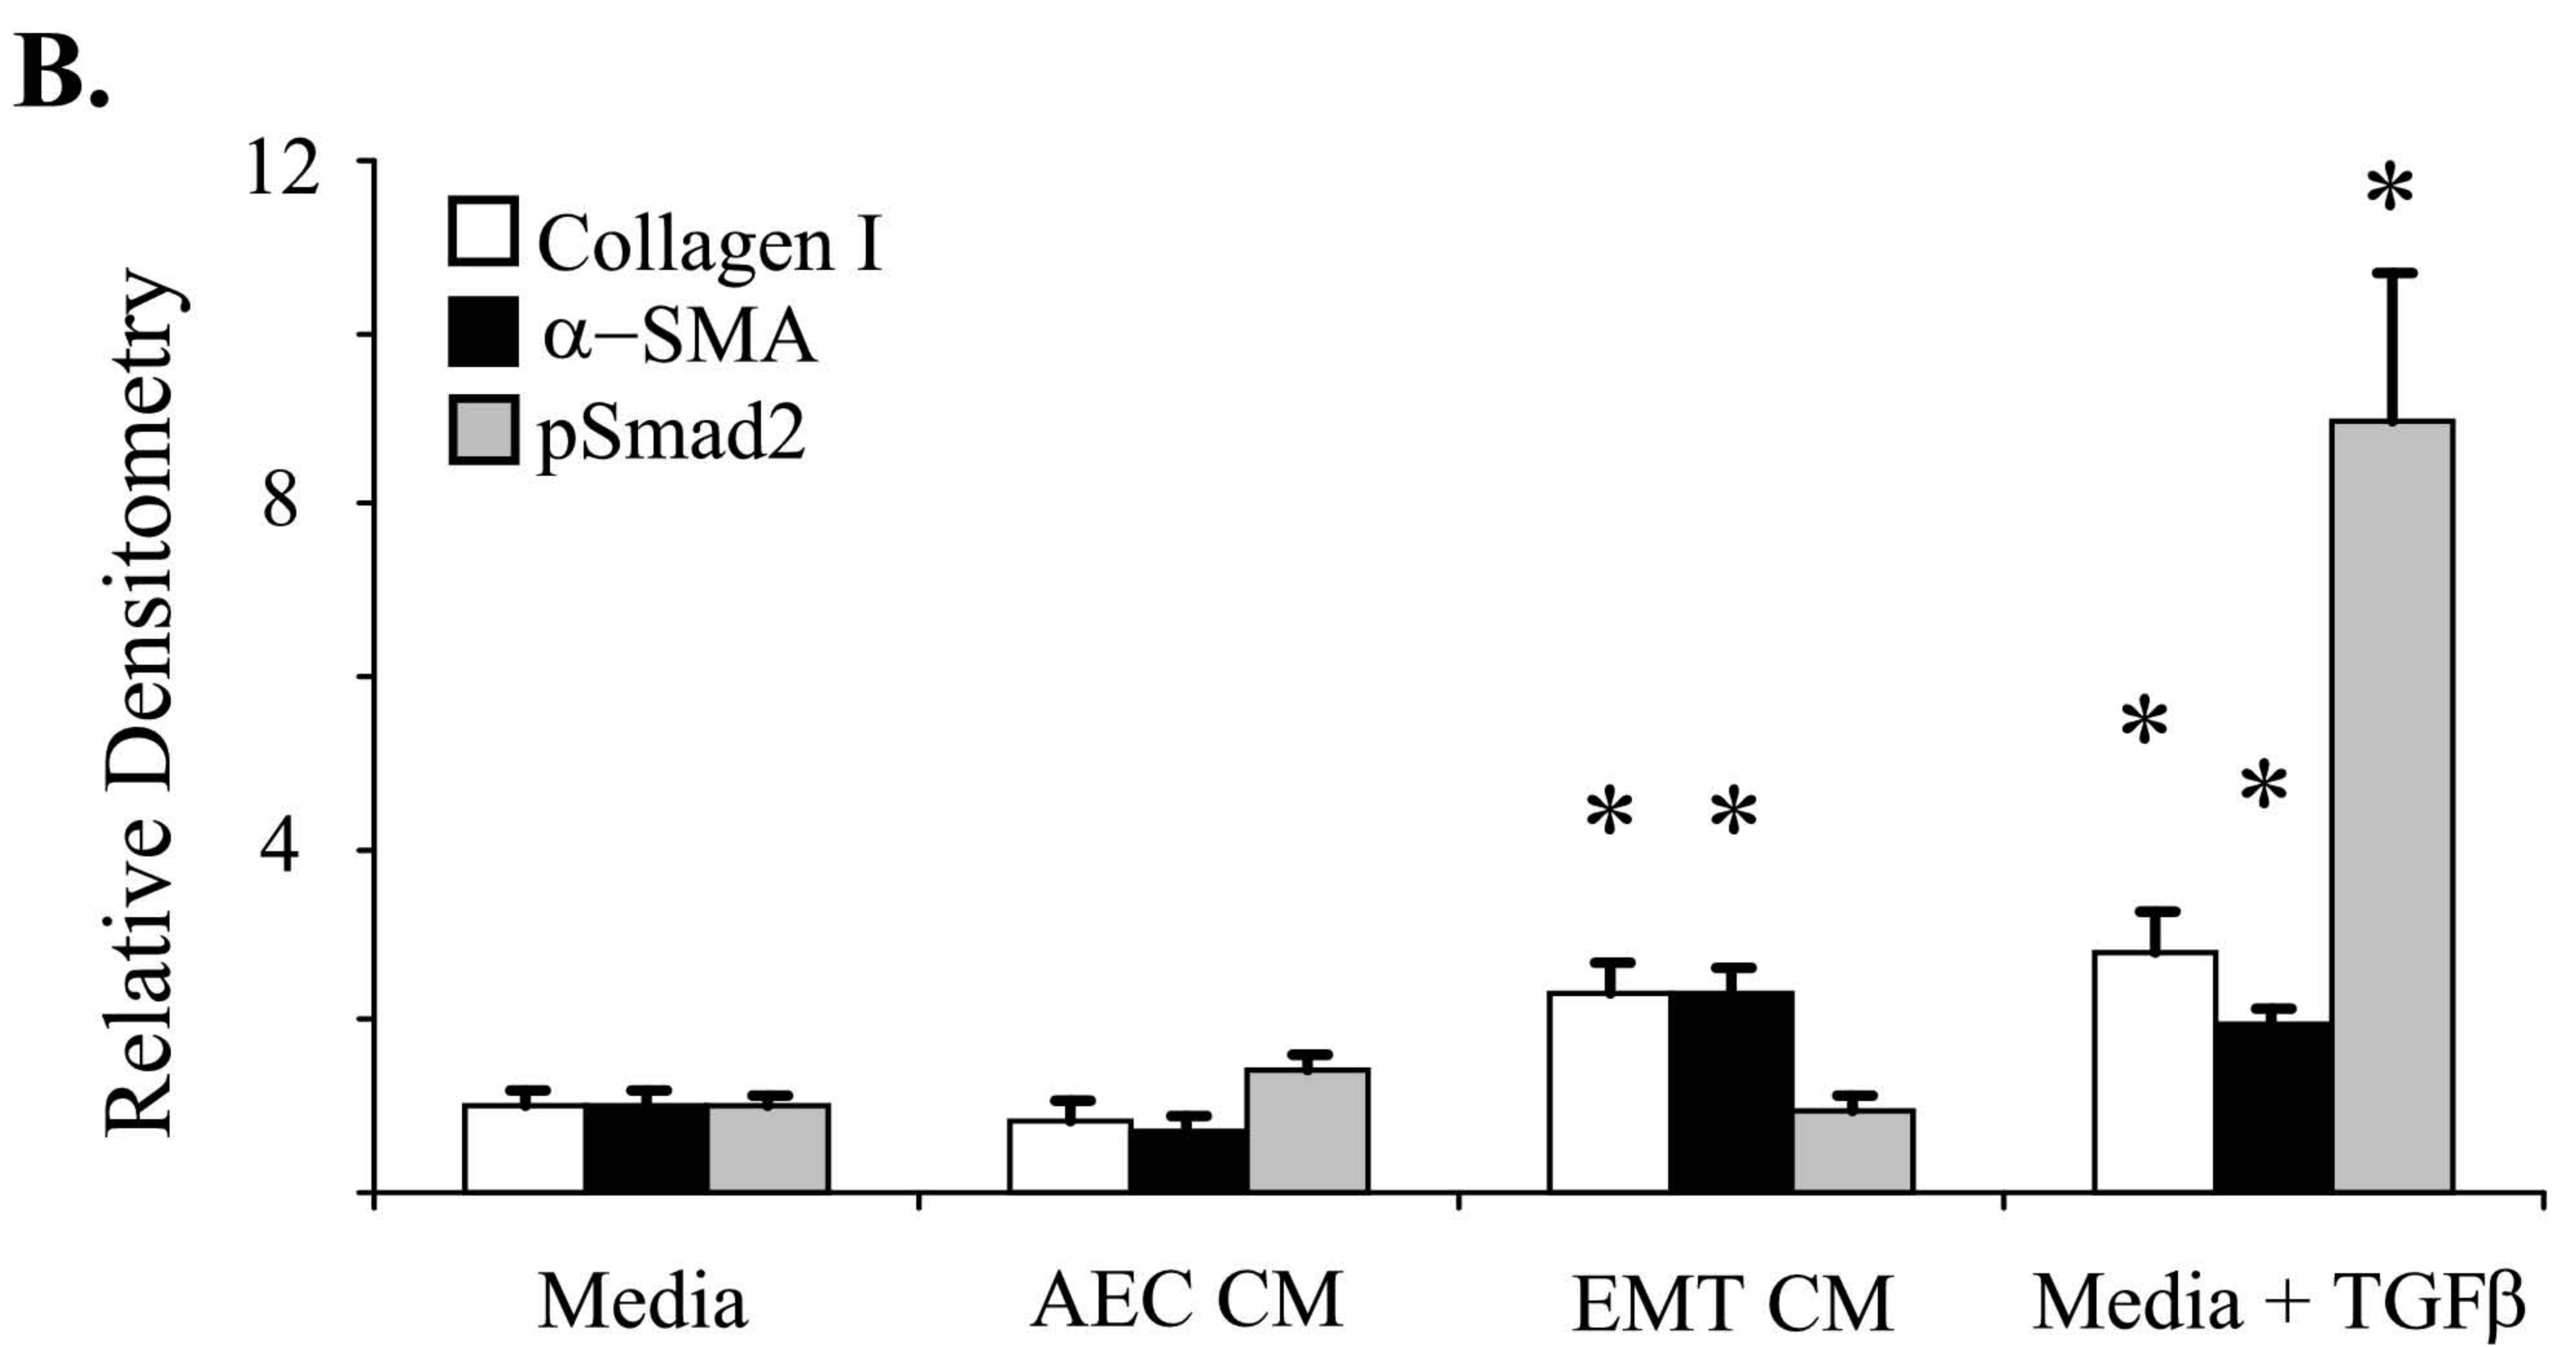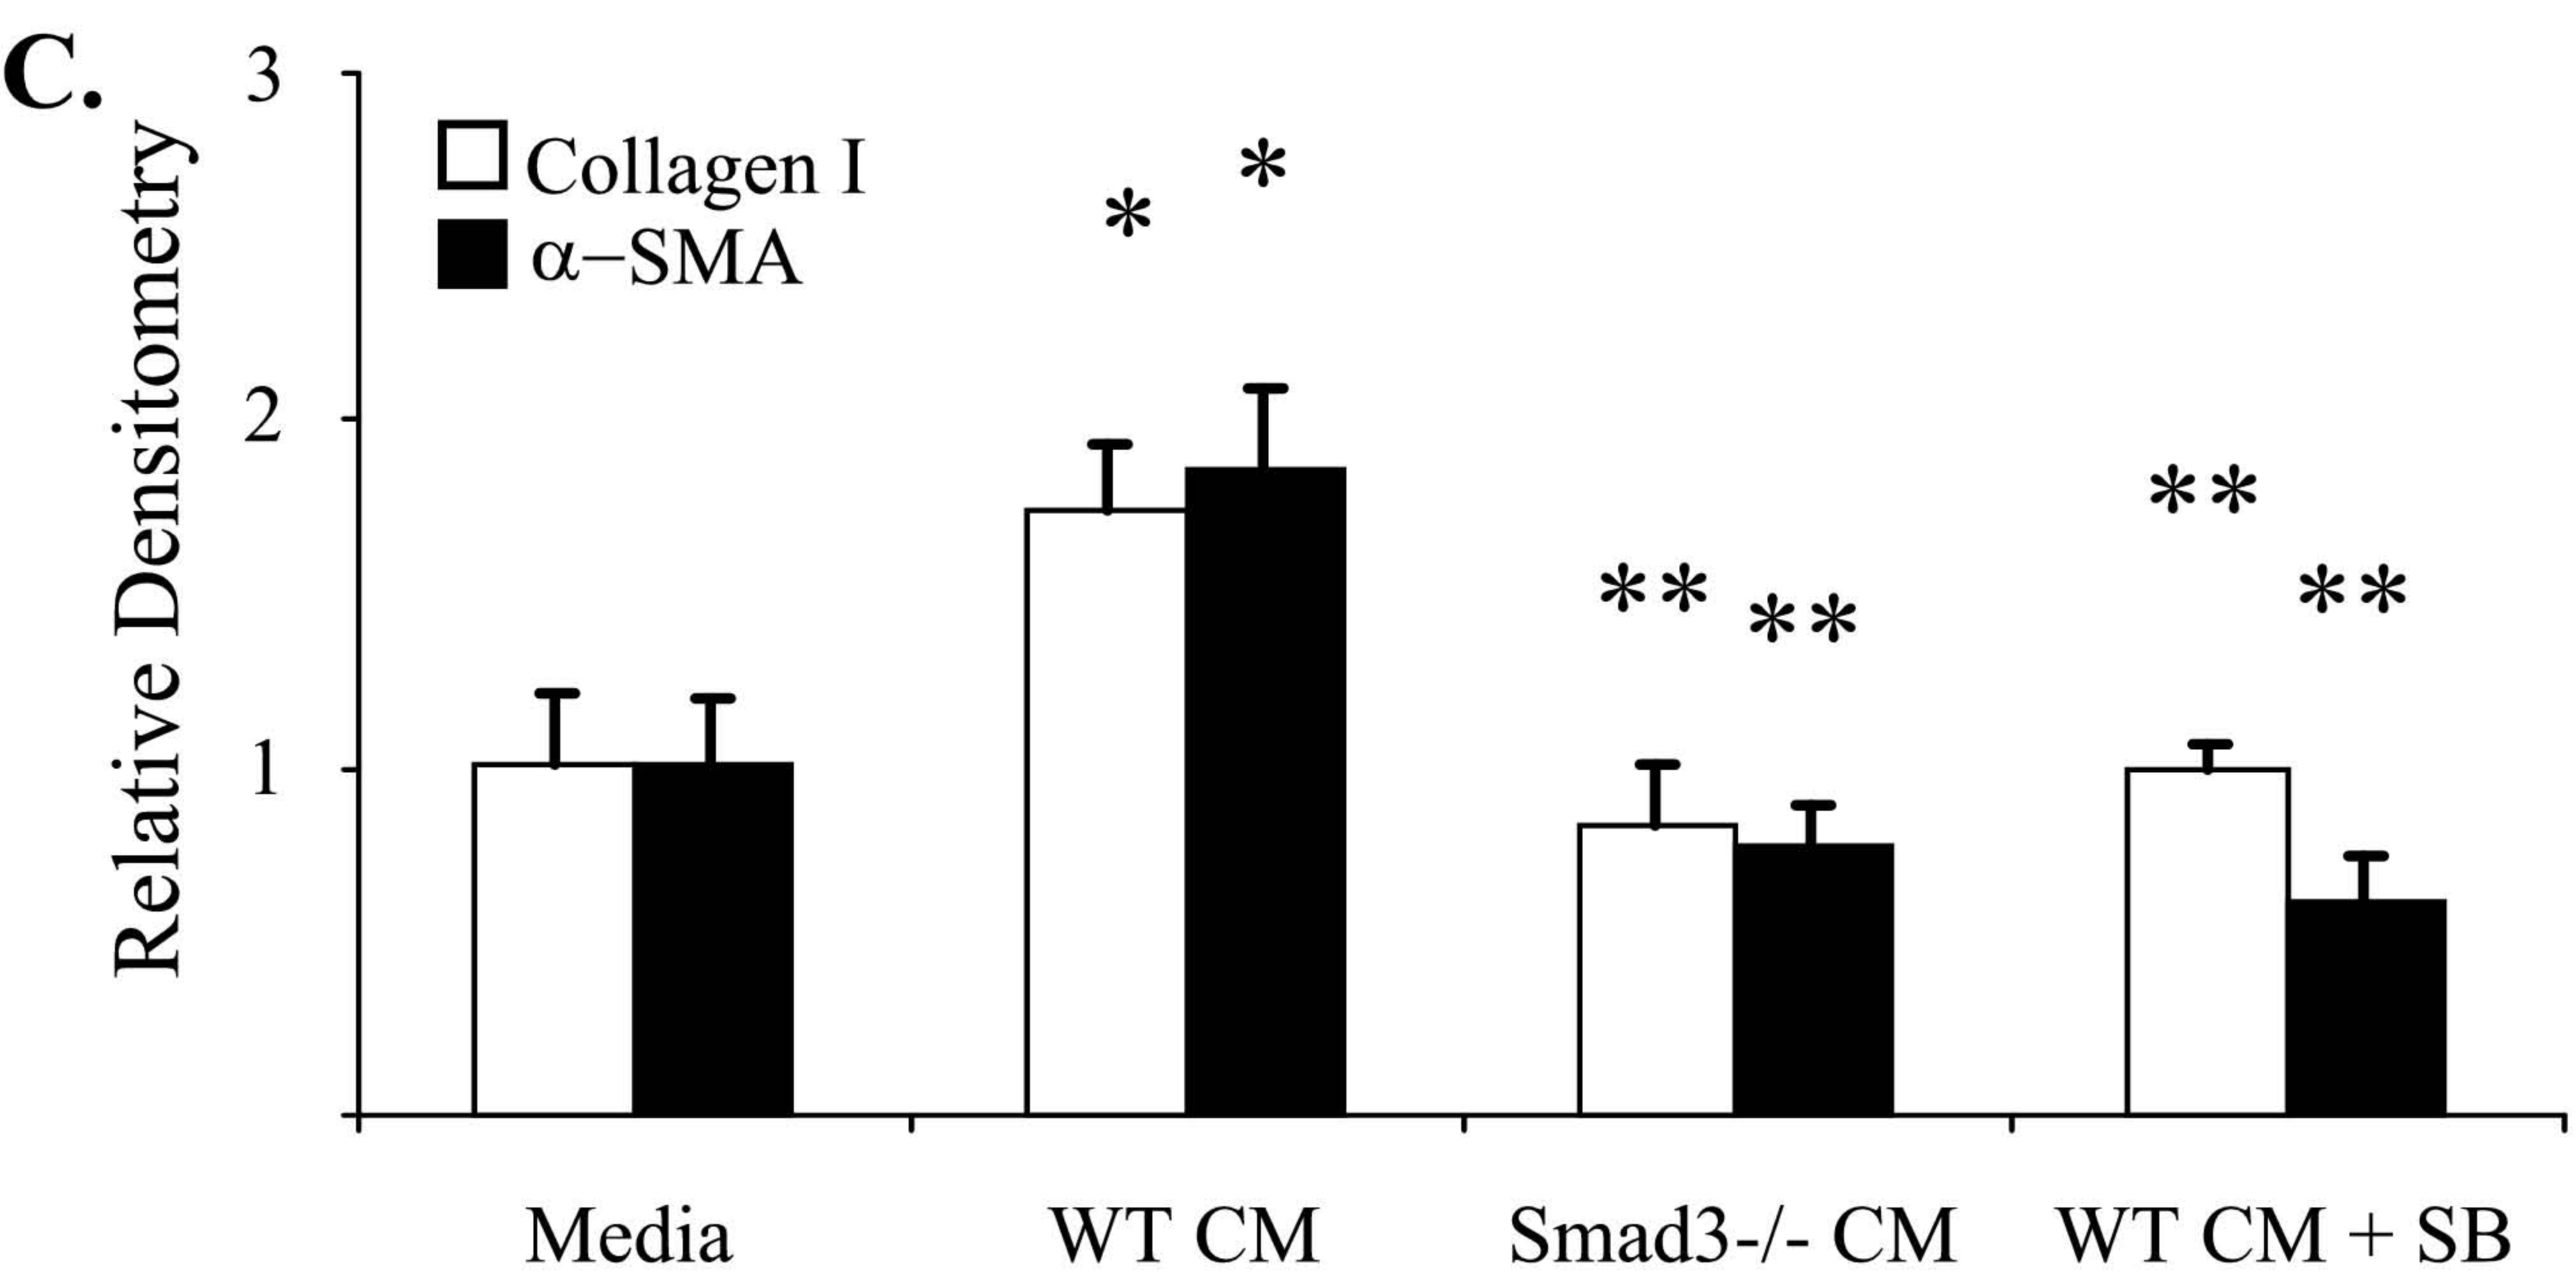

Supplement: mmc7.pdf [file mmc7.pdf]

A.

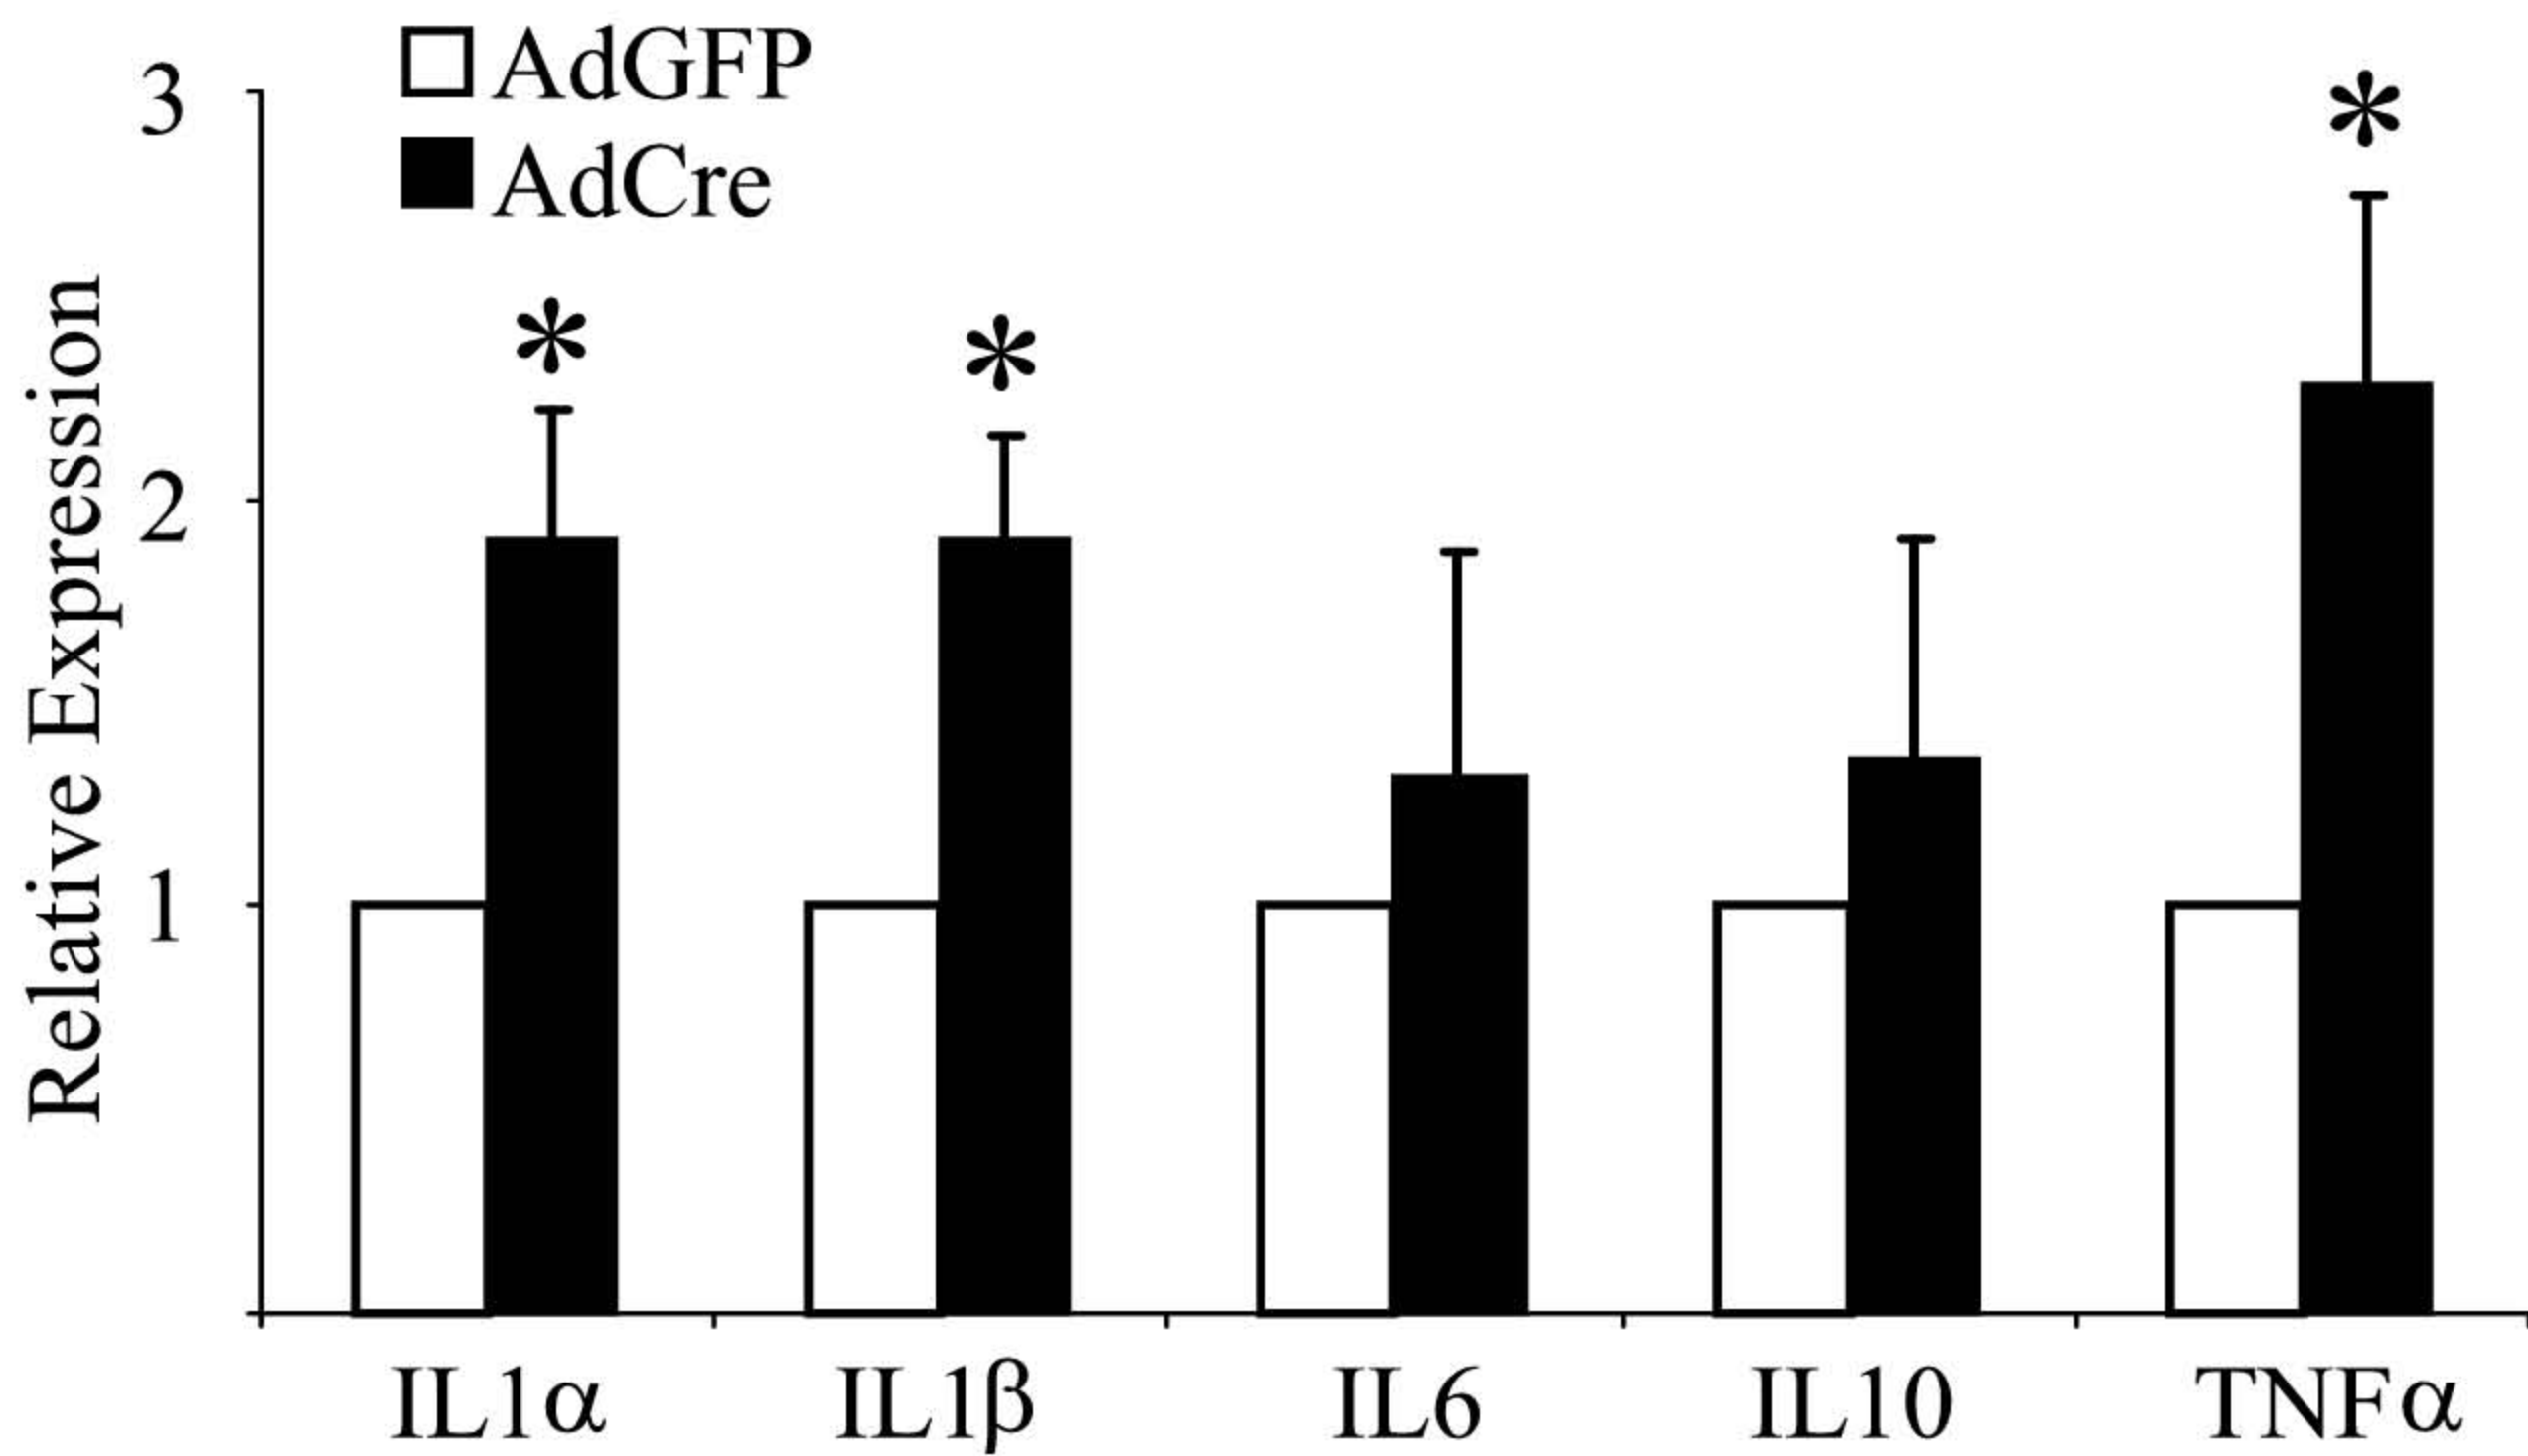

B.

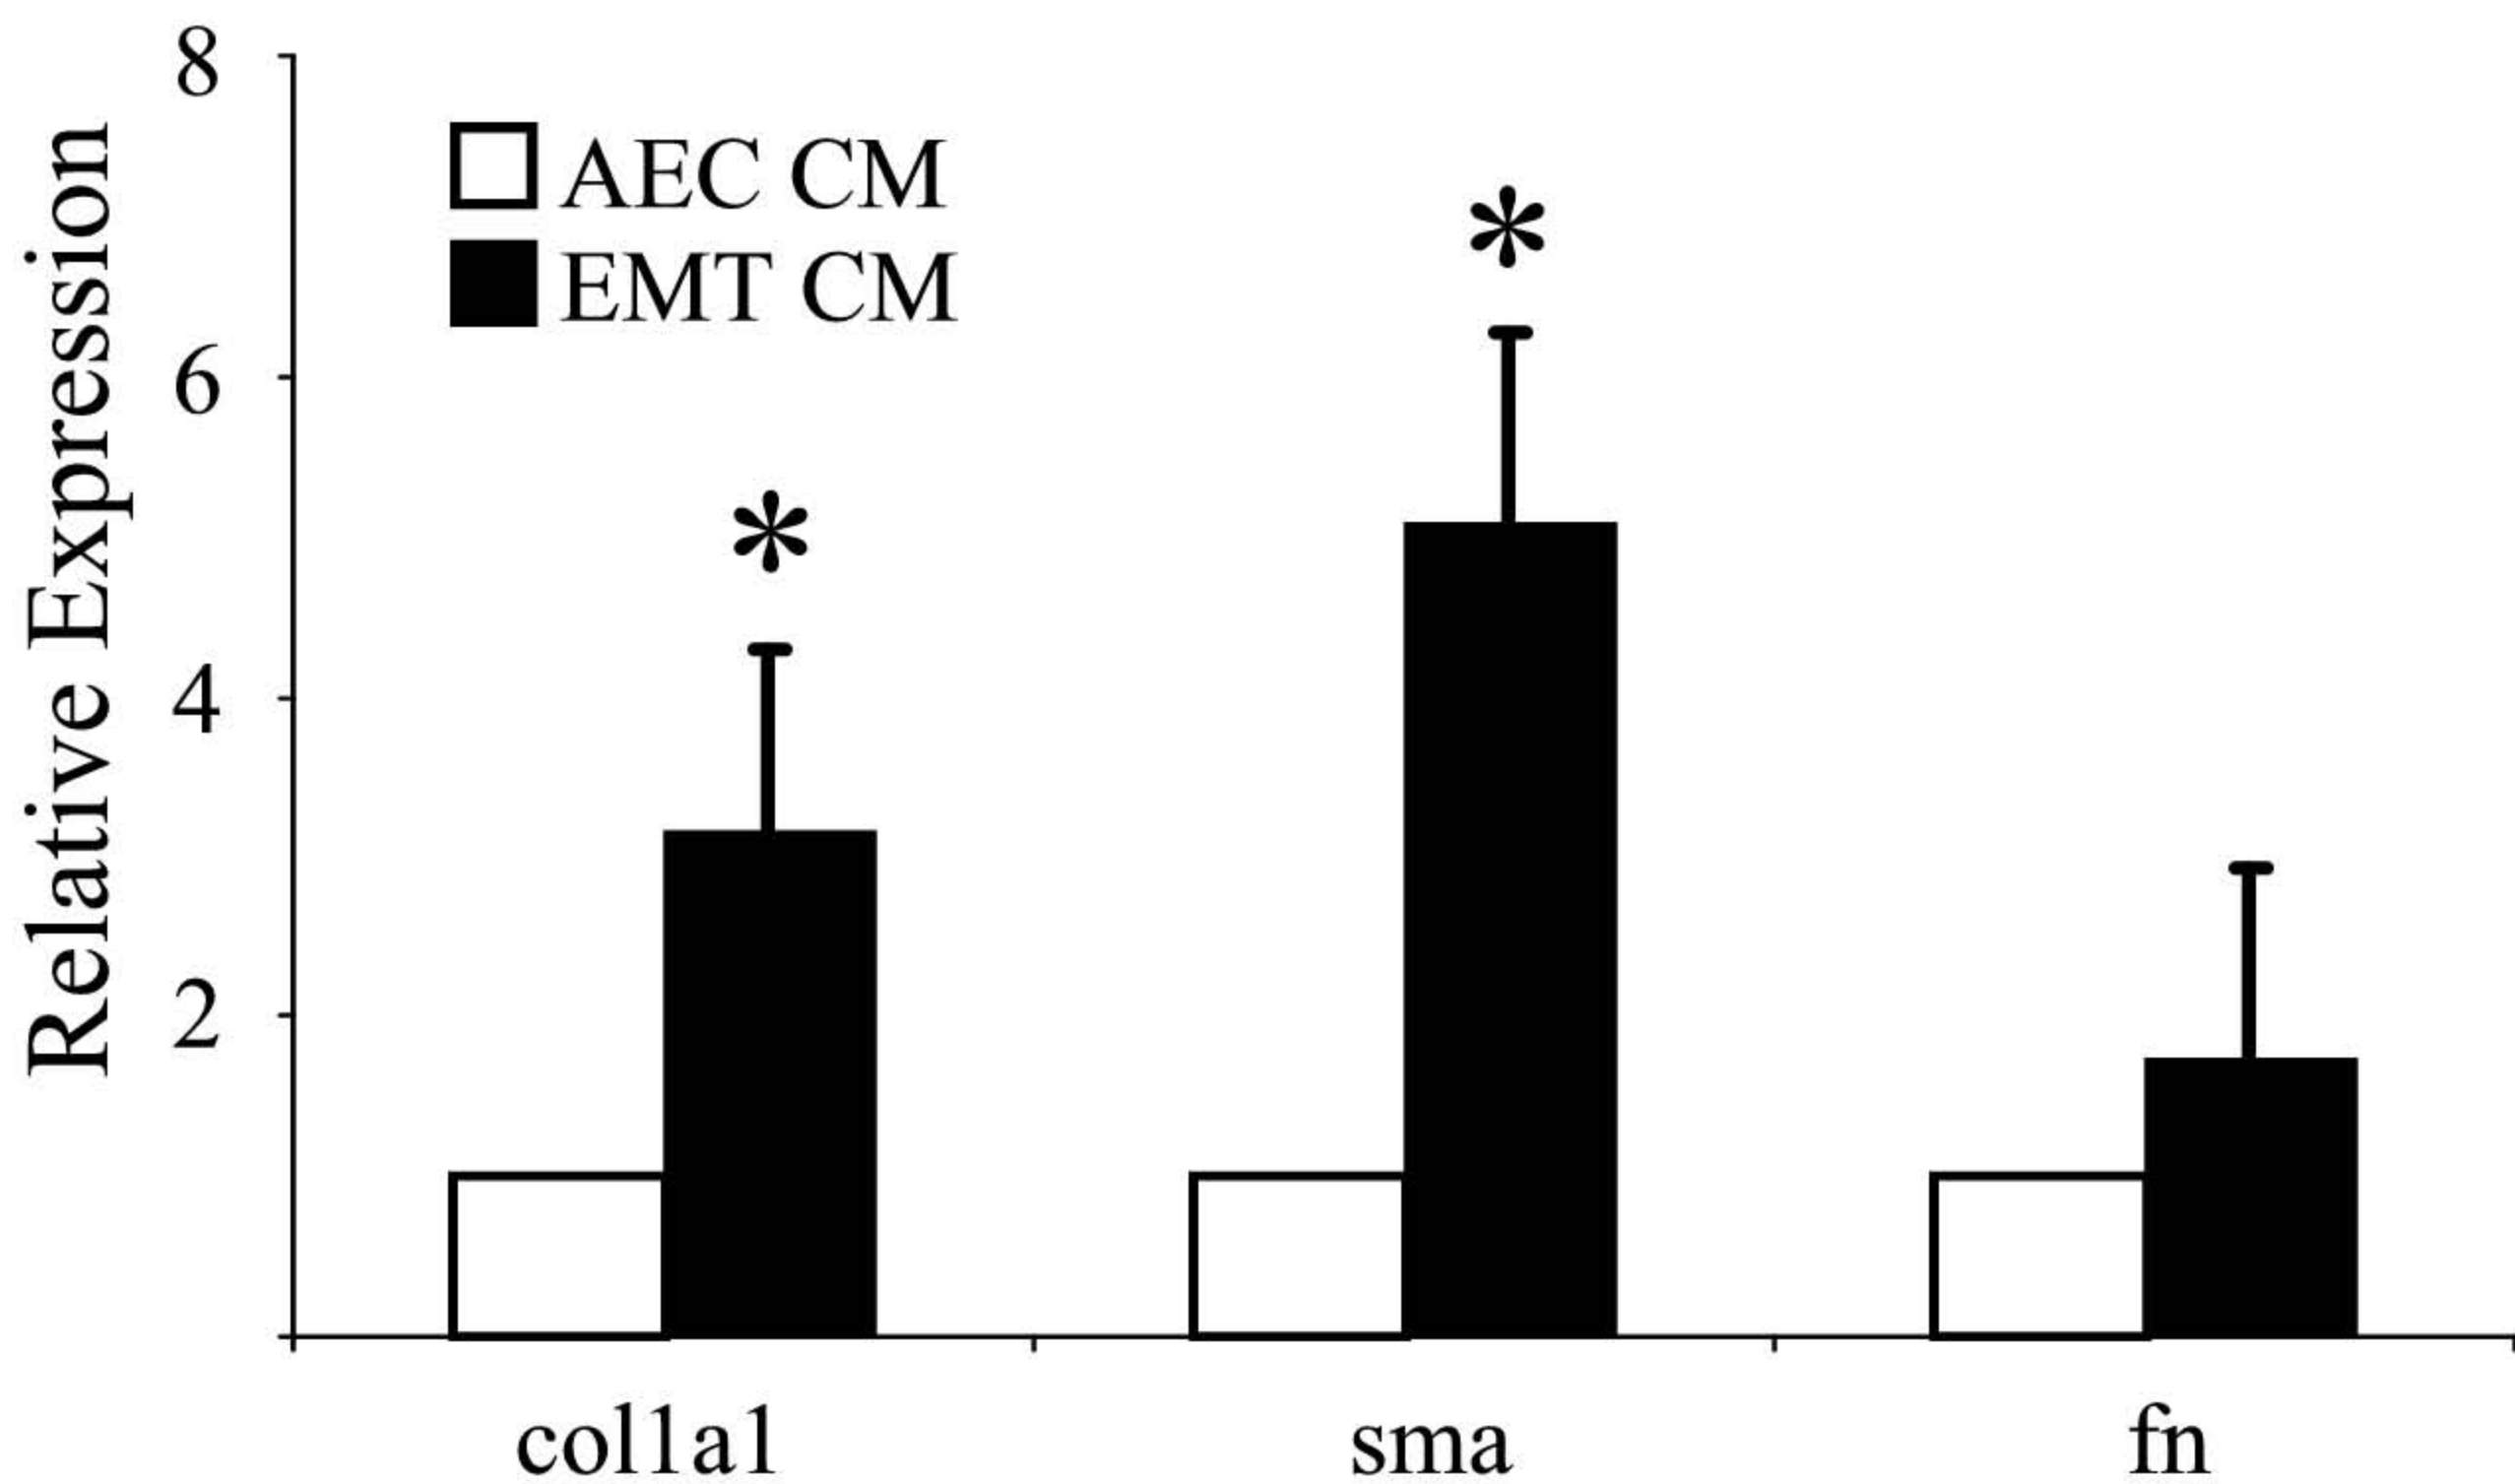

Supplement: mmc8.pdf [file mmc8.pdf]
